# Supplementary material for: Taxonomic classification of strain PO100/5 shows a broader geographic distribution and genetic markers of the recently described Corynebacterium silvaticum
Source: PubMed Central journal article supplement (PMC7751848; doi:10.1371/journal.pone.0244210), 2020-12-21
Supplement: pone.0244210.s009.pdf [file pone.0244210.s009.pdf]

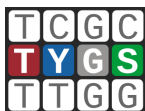

PRINT DATE: 2020-06-11 22:42:34 +0200

JOB ID: 3f1a8641-39bd-4f4c-b3ac-0c6455711329

RESULT PAGE: [https://tygs.dsmz.de/user\\_results/show?guid=3f1a8641-39bd-4f4c-b3ac-0c6455711329](https://tygs.dsmz.de/user_results/show?guid=3f1a8641-39bd-4f4c-b3ac-0c6455711329)

### Table 1: Phylogenies

**Publication-ready versions** of both the genome-scale GBDP tree and the 16S rRNA gene sequence tree can be customized and exported either in SVG (vector graphic) or PNG format from within the phylogeny viewers in your TYGS result page. For publications the **SVG format is recommended** because it is lossless, always keeps its high resolution and can also be easily converted to other popular formats such as PDF or EPS. Please follow the link provided above!

### Table 2: Identification

The below list contains the result of the TYGS species identification routine.

Explanation of remarks that might occur in the below table:

**remark [R1]:** The TYGS type strain database is automatically updated on an almost daily basis. However, if a particular type strain genome is not available in the TYGS database, this can have several reasons which are detailed in the FAQ. You can request an extended 16S rRNA gene analysis via the 16S tree viewer found in your result page to detect **not yet genome-sequenced** type strains relevant for your study.

**remark [R2]:** > 70% dDDH value (formula  $d_4$ ) and (almost) minimal dDDH values for gene-content formulae  $d_0$  and  $d_6$  indicate a potentially unreliable identification result and should thus be checked via the 16S rRNA gene sequence similarity. Such strong deviations can, in principle, be caused by sequence contamination.

**remark [R3]:** G+C content difference of > 1 % indicates a potentially unreliable identification result because within species G+C content varies no more than 1 %, if computed from genome sequences (PMID: 24505073).

| Strain   | Conclusion               | Identification result           | Remark |
|----------|--------------------------|---------------------------------|--------|
| 'KL0475' | belongs to known species | <i>Corynebacterium ulcerans</i> |        |
| 'KL0483' | belongs to known species | <i>Corynebacterium ulcerans</i> |        |
| 'KL0497' | belongs to known species | <i>Corynebacterium ulcerans</i> |        |
| 'KL0501' | belongs to known species | <i>Corynebacterium ulcerans</i> |        |
| 'KL0515' | belongs to known species | <i>Corynebacterium ulcerans</i> |        |
| 'KL0540' | belongs to known species | <i>Corynebacterium ulcerans</i> |        |
| 'KL0541' | belongs to known species | <i>Corynebacterium ulcerans</i> |        |
| 'KL0547' | belongs to known species | <i>Corynebacterium ulcerans</i> |        |
| 'KL0556' | belongs to known species | <i>Corynebacterium ulcerans</i> |        |
| 'KL0785' | belongs to known species | <i>Corynebacterium ulcerans</i> |        |
| 'KL0796' | belongs to known species | <i>Corynebacterium ulcerans</i> |        |
| 'KL0818' | belongs to known species | <i>Corynebacterium ulcerans</i> |        |
| 'KL0825' | belongs to known species | <i>Corynebacterium ulcerans</i> |        |
| 'KL0832' | belongs to known species | <i>Corynebacterium ulcerans</i> |        |
| 'KL0840' | belongs to known species | <i>Corynebacterium ulcerans</i> |        |

| Strain   | Conclusion               | Identification result           | Remark |
|----------|--------------------------|---------------------------------|--------|
| 'KL0846' | belongs to known species | <i>Corynebacterium ulcerans</i> |        |
| 'KL0853' | belongs to known species | <i>Corynebacterium ulcerans</i> |        |
| 'KL0867' | belongs to known species | <i>Corynebacterium ulcerans</i> |        |
| 'KL0870' | belongs to known species | <i>Corynebacterium ulcerans</i> |        |
| 'KL0876' | belongs to known species | <i>Corynebacterium ulcerans</i> |        |

**Table 3: Pairwise comparisons of user genomes vs. type-strain genomes**

The following table contains the pairwise dDDH values between your user genomes and the selected type-strain genomes. The dDDH values are provided along with their confidence intervals (C.I.) for the three different GBDP formulas:

- formula  $d_0$  (a.k.a. GGDC formula 1): length of all HSPs divided by total genome length
- formula  $d_4$  (a.k.a. GGDC formula 2): sum of all identities found in HSPs divided by overall HSP length
- formula  $d_6$  (a.k.a. GGDC formula 3): sum of all identities found in HSPs divided by total genome length

**Note:** Formula  $d_4$  is independent of genome length and is thus robust against the use of incomplete draft genomes. For other reasons for preferring formula  $d_4$ , see the FAQ.

| Query    | Subject  | $d_0$ | C.I. $d_0$      | $d_4$ | C.I. $d_4$      | $d_6$ | C.I. $d_6$      | Diff. G+C Percent |
|----------|----------|-------|-----------------|-------|-----------------|-------|-----------------|-------------------|
| 'KL0785' | 'KL0818' | 100.0 | [100.0 - 100.0] | 100.0 | [100.0 - 100.0] | 100.0 | [100.0 - 100.0] | 0.01              |
| 'KL0515' | 'KL0785' | 99.4  | [98.8 - 99.7]   | 99.9  | [99.8 - 100.0]  | 99.7  | [99.5 - 99.9]   | 0.04              |
| 'KL0515' | 'KL0818' | 99.3  | [98.7 - 99.6]   | 99.9  | [99.8 - 100.0]  | 99.7  | [99.4 - 99.8]   | 0.03              |
| 'KL0483' | 'KL0846' | 98.2  | [97.0 - 98.9]   | 99.6  | [99.4 - 99.8]   | 99.1  | [98.6 - 99.5]   | 0.08              |
| 'KL0825' | 'KL0846' | 99.6  | [99.1 - 99.8]   | 99.6  | [99.4 - 99.8]   | 99.8  | [99.6 - 99.9]   | 0.0               |
| 'KL0475' | 'KL0846' | 95.2  | [93.0 - 96.8]   | 99.6  | [99.3 - 99.8]   | 97.4  | [96.1 - 98.3]   | 0.01              |
| 'KL0483' | 'KL0832' | 98.4  | [97.3 - 99.1]   | 99.6  | [99.3 - 99.7]   | 99.2  | [98.7 - 99.6]   | 0.09              |
| 'KL0825' | 'KL0840' | 99.6  | [99.3 - 99.8]   | 99.6  | [99.3 - 99.8]   | 99.8  | [99.7 - 99.9]   | 0.0               |
| 'KL0840' | 'KL0846' | 100.0 | [99.9 - 100.0]  | 99.6  | [99.3 - 99.8]   | 100.0 | [99.9 - 100.0]  | 0.0               |
| 'KL0540' | 'KL0547' | 97.9  | [96.6 - 98.8]   | 99.6  | [99.3 - 99.7]   | 99.0  | [98.3 - 99.4]   | 0.02              |
| 'KL0475' | 'KL0832' | 95.5  | [93.4 - 97.0]   | 99.5  | [99.2 - 99.7]   | 97.6  | [96.4 - 98.4]   | 0.01              |
| 'KL0475' | 'KL0840' | 95.6  | [93.5 - 97.1]   | 99.5  | [99.2 - 99.7]   | 97.7  | [96.4 - 98.5]   | 0.01              |
| 'KL0547' | 'KL0867' | 99.7  | [99.4 - 99.9]   | 99.5  | [99.3 - 99.7]   | 99.9  | [99.7 - 99.9]   | 0.0               |
| 'KL0796' | 'KL0846' | 97.7  | [96.2 - 98.6]   | 99.5  | [99.2 - 99.7]   | 98.8  | [98.1 - 99.3]   | 0.04              |
| 'KL0483' | 'KL0840' | 98.4  | [97.2 - 99.0]   | 99.5  | [99.2 - 99.7]   | 99.2  | [98.6 - 99.5]   | 0.08              |
| 'KL0796' | 'KL0832' | 97.9  | [96.5 - 98.7]   | 99.5  | [99.2 - 99.7]   | 98.9  | [98.3 - 99.4]   | 0.04              |
| 'KL0540' | 'KL0867' | 98.7  | [97.7 - 99.2]   | 99.5  | [99.2 - 99.7]   | 99.4  | [98.9 - 99.6]   | 0.02              |
| 'KL0832' | 'KL0846' | 100.0 | [99.9 - 100.0]  | 99.5  | [99.2 - 99.7]   | 100.0 | [100.0 - 100.0] | 0.01              |
| 'KL0825' | 'KL0832' | 99.7  | [99.3 - 99.8]   | 99.5  | [99.2 - 99.7]   | 99.9  | [99.7 - 99.9]   | 0.0               |
| 'KL0796' | 'KL0840' | 97.8  | [96.4 - 98.7]   | 99.5  | [99.3 - 99.7]   | 98.9  | [98.2 - 99.3]   | 0.04              |
| 'KL0832' | 'KL0840' | 100.0 | [100.0 - 100.0] | 99.5  | [99.2 - 99.7]   | 100.0 | [100.0 - 100.0] | 0.0               |
| 'KL0483' | 'KL0825' | 98.2  | [96.9 - 98.9]   | 99.4  | [99.0 - 99.6]   | 99.1  | [98.5 - 99.5]   | 0.08              |

| Query    | Subject  | $d_0$ | C.I. $d_0$    | $d_4$ | C.I. $d_4$    | $d_6$ | C.I. $d_6$    | Diff. G+C Percent |
|----------|----------|-------|---------------|-------|---------------|-------|---------------|-------------------|
| 'KL0796' | 'KL0825' | 97.9  | [96.5 - 98.7] | 99.4  | [99.0 - 99.6] | 98.9  | [98.2 - 99.4] | 0.04              |
| 'KL0475' | 'KL0796' | 97.0  | [95.3 - 98.1] | 99.3  | [99.0 - 99.6] | 98.5  | [97.6 - 99.0] | 0.03              |
| 'KL0475' | 'KL0825' | 96.4  | [94.5 - 97.6] | 99.2  | [98.7 - 99.5] | 98.0  | [97.0 - 98.7] | 0.01              |
| 'KL0483' | 'KL0796' | 98.9  | [98.0 - 99.4] | 98.9  | [98.3 - 99.3] | 99.4  | [99.0 - 99.7] | 0.05              |
| 'KL0475' | 'KL0483' | 96.3  | [94.4 - 97.6] | 98.8  | [98.1 - 99.2] | 98.0  | [96.9 - 98.7] | 0.08              |
| 'KL0541' | 'KL0867' | 97.3  | [95.7 - 98.3] | 98.5  | [97.8 - 99.0] | 98.5  | [97.7 - 99.1] | 0.03              |
| 'KL0541' | 'KL0547' | 97.8  | [96.5 - 98.7] | 98.5  | [97.7 - 99.0] | 98.8  | [98.1 - 99.3] | 0.02              |
| 'KL0540' | 'KL0541' | 97.0  | [95.3 - 98.1] | 98.4  | [97.6 - 98.9] | 98.3  | [97.4 - 98.9] | 0.01              |
| 'KL0541' | 'KL0840' | 95.4  | [93.2 - 96.9] | 97.0  | [95.9 - 97.9] | 97.2  | [95.9 - 98.1] | 0.05              |
| 'KL0541' | 'KL0846' | 95.2  | [93.0 - 96.8] | 97.0  | [95.9 - 97.9] | 97.1  | [95.7 - 98.0] | 0.05              |
| 'KL0846' | 'KL0867' | 98.4  | [97.3 - 99.1] | 97.0  | [95.8 - 97.8] | 99.0  | [98.4 - 99.4] | 0.02              |
| 'KL0541' | 'KL0832' | 95.5  | [93.3 - 97.0] | 97.0  | [95.9 - 97.9] | 97.3  | [96.0 - 98.2] | 0.06              |
| 'KL0840' | 'KL0867' | 98.5  | [97.5 - 99.2] | 96.9  | [95.7 - 97.8] | 99.1  | [98.5 - 99.5] | 0.03              |
| 'KL0832' | 'KL0867' | 98.6  | [97.6 - 99.2] | 96.9  | [95.7 - 97.8] | 99.2  | [98.6 - 99.5] | 0.03              |
| 'KL0547' | 'KL0846' | 97.7  | [96.2 - 98.6] | 96.9  | [95.7 - 97.7] | 98.6  | [97.8 - 99.1] | 0.03              |
| 'KL0547' | 'KL0832' | 97.9  | [96.6 - 98.7] | 96.8  | [95.6 - 97.7] | 98.7  | [98.0 - 99.2] | 0.03              |
| 'KL0547' | 'KL0840' | 97.8  | [96.5 - 98.7] | 96.8  | [95.6 - 97.7] | 98.7  | [97.9 - 99.2] | 0.03              |
| 'KL0540' | 'KL0846' | 99.3  | [98.7 - 99.6] | 96.8  | [95.6 - 97.7] | 99.6  | [99.2 - 99.8] | 0.04              |
| 'KL0483' | 'KL0867' | 98.2  | [96.9 - 98.9] | 96.7  | [95.5 - 97.6] | 98.9  | [98.2 - 99.3] | 0.06              |
| 'KL0825' | 'KL0867' | 98.3  | [97.1 - 99.0] | 96.7  | [95.4 - 97.6] | 98.9  | [98.3 - 99.4] | 0.03              |
| 'KL0541' | 'KL0825' | 95.5  | [93.3 - 97.0] | 96.7  | [95.4 - 97.6] | 97.2  | [95.9 - 98.2] | 0.05              |
| 'KL0483' | 'KL0547' | 97.4  | [95.9 - 98.4] | 96.7  | [95.5 - 97.6] | 98.4  | [97.5 - 99.0] | 0.05              |
| 'KL0497' | 'KL0547' | 98.4  | [97.3 - 99.1] | 96.6  | [95.3 - 97.5] | 99.0  | [98.4 - 99.4] | 0.04              |
| 'KL0547' | 'KL0825' | 97.5  | [96.0 - 98.5] | 96.6  | [95.3 - 97.5] | 98.5  | [97.6 - 99.1] | 0.03              |
| 'KL0540' | 'KL0840' | 99.4  | [98.8 - 99.7] | 96.6  | [95.3 - 97.5] | 99.6  | [99.3 - 99.8] | 0.05              |
| 'KL0547' | 'KL0796' | 97.1  | [95.5 - 98.2] | 96.6  | [95.4 - 97.5] | 98.3  | [97.3 - 98.9] | 0.01              |
| 'KL0483' | 'KL0540' | 98.6  | [97.6 - 99.2] | 96.6  | [95.4 - 97.5] | 99.1  | [98.5 - 99.5] | 0.04              |

| Query    | Subject  | $d_0$ | C.I. $d_0$    | $d_4$ | C.I. $d_4$    | $d_6$ | C.I. $d_6$    | Diff. G+C Percent |
|----------|----------|-------|---------------|-------|---------------|-------|---------------|-------------------|
| 'KL0497' | 'KL0867' | 98.9  | [98.0 - 99.4] | 96.5  | [95.3 - 97.5] | 99.3  | [98.8 - 99.6] | 0.03              |
| 'KL0796' | 'KL0867' | 97.7  | [96.3 - 98.6] | 96.5  | [95.3 - 97.5] | 98.6  | [97.7 - 99.1] | 0.01              |
| 'KL0540' | 'KL0832' | 99.5  | [98.9 - 99.7] | 96.5  | [95.2 - 97.5] | 99.6  | [99.3 - 99.8] | 0.05              |
| 'KL0540' | 'KL0825' | 98.8  | [97.9 - 99.3] | 96.4  | [95.1 - 97.4] | 99.2  | [98.7 - 99.6] | 0.05              |
| 'KL0497' | 'KL0540' | 98.8  | [97.9 - 99.3] | 96.4  | [95.1 - 97.4] | 99.2  | [98.7 - 99.6] | 0.06              |
| 'KL0475' | 'KL0867' | 95.6  | [93.5 - 97.1] | 96.3  | [95.0 - 97.3] | 97.3  | [95.9 - 98.2] | 0.02              |
| 'KL0501' | 'KL0540' | 99.1  | [98.4 - 99.5] | 96.3  | [95.0 - 97.3] | 99.4  | [99.0 - 99.7] | 0.05              |
| 'KL0540' | 'KL0796' | 97.4  | [95.9 - 98.4] | 96.3  | [94.9 - 97.3] | 98.4  | [97.5 - 99.0] | 0.01              |
| 'KL0475' | 'KL0547' | 94.9  | [92.5 - 96.5] | 96.3  | [95.0 - 97.3] | 96.8  | [95.3 - 97.8] | 0.02              |
| 'KL0501' | 'KL0867' | 98.4  | [97.3 - 99.1] | 96.3  | [94.9 - 97.3] | 99.0  | [98.3 - 99.4] | 0.03              |
| 'KL0497' | 'KL0541' | 96.2  | [94.2 - 97.5] | 96.2  | [94.8 - 97.2] | 97.6  | [96.4 - 98.4] | 0.06              |
| 'KL0501' | 'KL0547' | 97.7  | [96.2 - 98.6] | 96.2  | [94.9 - 97.2] | 98.5  | [97.7 - 99.1] | 0.03              |
| 'KL0475' | 'KL0541' | 94.4  | [91.9 - 96.1] | 96.2  | [94.8 - 97.2] | 96.4  | [94.9 - 97.5] | 0.04              |
| 'KL0541' | 'KL0796' | 98.7  | [97.8 - 99.3] | 96.2  | [94.9 - 97.2] | 99.2  | [98.6 - 99.5] | 0.01              |
| 'KL0475' | 'KL0540' | 94.1  | [91.6 - 95.9] | 96.0  | [94.6 - 97.1] | 96.3  | [94.6 - 97.4] | 0.04              |
| 'KL0483' | 'KL0541' | 97.1  | [95.4 - 98.1] | 95.7  | [94.3 - 96.8] | 98.1  | [97.1 - 98.8] | 0.03              |
| 'KL0497' | 'KL0796' | 98.2  | [96.9 - 98.9] | 95.6  | [94.1 - 96.7] | 98.8  | [98.0 - 99.3] | 0.05              |
| 'KL0497' | 'KL0840' | 99.6  | [99.1 - 99.8] | 95.5  | [94.0 - 96.6] | 99.6  | [99.3 - 99.8] | 0.01              |
| 'KL0497' | 'KL0846' | 99.5  | [99.0 - 99.7] | 95.4  | [93.9 - 96.6] | 99.6  | [99.2 - 99.8] | 0.01              |
| 'KL0497' | 'KL0825' | 98.9  | [98.1 - 99.4] | 95.4  | [93.9 - 96.6] | 99.2  | [98.7 - 99.6] | 0.01              |
| 'KL0497' | 'KL0832' | 99.6  | [99.2 - 99.8] | 95.4  | [93.9 - 96.5] | 99.7  | [99.4 - 99.8] | 0.0               |
| 'KL0501' | 'KL0541' | 95.2  | [93.0 - 96.8] | 95.4  | [93.9 - 96.6] | 96.9  | [95.5 - 97.9] | 0.06              |
| 'KL0483' | 'KL0497' | 97.4  | [95.8 - 98.4] | 95.4  | [93.8 - 96.5] | 98.3  | [97.3 - 98.9] | 0.09              |
| 'KL0501' | 'KL0846' | 99.6  | [99.1 - 99.8] | 95.3  | [93.8 - 96.5] | 99.6  | [99.3 - 99.8] | 0.01              |
| 'KL0475' | 'KL0497' | 95.9  | [93.9 - 97.3] | 95.3  | [93.7 - 96.4] | 97.4  | [96.1 - 98.2] | 0.02              |
| 'KL0501' | 'KL0825' | 99.1  | [98.3 - 99.5] | 95.2  | [93.6 - 96.4] | 99.3  | [98.8 - 99.6] | 0.0               |
| 'KL0501' | 'KL0796' | 96.8  | [95.0 - 98.0] | 95.2  | [93.6 - 96.4] | 97.9  | [96.8 - 98.6] | 0.04              |

| Query    | Subject                                   | $d_0$ | C.I. $d_0$    | $d_4$ | C.I. $d_4$    | $d_6$ | C.I. $d_6$    | Diff. G+C Percent |
|----------|-------------------------------------------|-------|---------------|-------|---------------|-------|---------------|-------------------|
| 'KL0501' | 'KL0832'                                  | 99.7  | [99.4 - 99.9] | 95.2  | [93.7 - 96.4] | 99.7  | [99.5 - 99.8] | 0.0               |
| 'KL0501' | 'KL0840'                                  | 99.7  | [99.3 - 99.8] | 95.2  | [93.7 - 96.4] | 99.7  | [99.4 - 99.8] | 0.0               |
| 'KL0483' | 'KL0501'                                  | 97.5  | [95.9 - 98.4] | 95.2  | [93.7 - 96.4] | 98.3  | [97.4 - 98.9] | 0.09              |
| 'KL0475' | 'KL0501'                                  | 94.2  | [91.7 - 96.0] | 94.9  | [93.3 - 96.2] | 96.2  | [94.5 - 97.3] | 0.01              |
| 'KL0497' | 'KL0501'                                  | 99.1  | [98.4 - 99.5] | 94.3  | [92.6 - 95.6] | 99.3  | [98.8 - 99.6] | 0.0               |
| 'KL0853' | 'KL0876'                                  | 96.9  | [95.2 - 98.0] | 93.1  | [91.2 - 94.7] | 97.8  | [96.6 - 98.6] | 0.13              |
| 'KL0870' | 'KL0876'                                  | 96.2  | [94.2 - 97.5] | 91.9  | [89.8 - 93.6] | 97.2  | [95.9 - 98.1] | 0.09              |
| 'KL0515' | 'KL0853'                                  | 96.5  | [94.7 - 97.8] | 90.9  | [88.7 - 92.7] | 97.3  | [96.0 - 98.2] | 0.08              |
| 'KL0853' | 'KL0870'                                  | 96.5  | [94.7 - 97.8] | 90.6  | [88.3 - 92.4] | 97.3  | [96.0 - 98.2] | 0.04              |
| 'KL0497' | 'KL0870'                                  | 96.5  | [94.6 - 97.7] | 90.6  | [88.3 - 92.4] | 97.3  | [96.0 - 98.2] | 0.06              |
| 'KL0785' | 'KL0853'                                  | 97.6  | [96.1 - 98.5] | 90.4  | [88.1 - 92.2] | 98.0  | [96.9 - 98.7] | 0.04              |
| 'KL0818' | 'KL0853'                                  | 97.6  | [96.1 - 98.5] | 90.3  | [88.1 - 92.2] | 98.0  | [96.9 - 98.7] | 0.05              |
| 'KL0497' | 'KL0876'                                  | 98.0  | [96.7 - 98.8] | 89.7  | [87.4 - 91.7] | 98.3  | [97.3 - 98.9] | 0.03              |
| 'KL0846' | 'KL0870'                                  | 96.5  | [94.6 - 97.7] | 89.4  | [87.0 - 91.4] | 97.2  | [95.8 - 98.1] | 0.05              |
| 'KL0475' | 'KL0870'                                  | 94.9  | [92.6 - 96.5] | 89.4  | [87.0 - 91.4] | 96.1  | [94.4 - 97.2] | 0.05              |
| 'KL0840' | 'KL0870'                                  | 96.6  | [94.8 - 97.8] | 89.3  | [86.9 - 91.3] | 97.3  | [95.9 - 98.2] | 0.06              |
| 'KL0832' | 'KL0870'                                  | 96.8  | [95.0 - 97.9] | 89.3  | [86.9 - 91.3] | 97.3  | [96.0 - 98.2] | 0.06              |
| 'KL0825' | 'KL0870'                                  | 97.8  | [96.5 - 98.7] | 89.2  | [86.8 - 91.2] | 98.1  | [97.0 - 98.8] | 0.06              |
| 'KL0846' | 'KL0876'                                  | 98.2  | [96.9 - 98.9] | 89.1  | [86.7 - 91.1] | 98.3  | [97.3 - 98.9] | 0.04              |
| 'KL0818' | 'KL0876'                                  | 97.1  | [95.4 - 98.2] | 89.1  | [86.7 - 91.1] | 97.6  | [96.3 - 98.4] | 0.08              |
| 'KL0501' | 'KL0870'                                  | 96.6  | [94.8 - 97.8] | 89.1  | [86.7 - 91.1] | 97.2  | [95.9 - 98.1] | 0.06              |
| 'KL0785' | <i>Corynebacterium ulcerans</i> NCTC 7910 | 97.0  | [95.3 - 98.1] | 89.1  | [86.7 - 91.2] | 97.5  | [96.3 - 98.3] | 0.05              |
| 'KL0785' | 'KL0876'                                  | 97.1  | [95.4 - 98.2] | 89.1  | [86.7 - 91.1] | 97.6  | [96.3 - 98.4] | 0.09              |
| 'KL0515' | <i>Corynebacterium ulcerans</i> NCTC 7910 | 98.0  | [96.8 - 98.8] | 89.1  | [86.7 - 91.1] | 98.2  | [97.2 - 98.9] | 0.01              |
| 'KL0475' | 'KL0876'                                  | 91.5  | [88.4 - 93.8] | 89.1  | [86.7 - 91.1] | 93.5  | [91.3 - 95.2] | 0.05              |
| 'KL0818' | <i>Corynebacterium ulcerans</i> NCTC 7910 | 97.0  | [95.3 - 98.1] | 89.1  | [86.7 - 91.1] | 97.5  | [96.3 - 98.3] | 0.04              |
| 'KL0832' | 'KL0876'                                  | 98.4  | [97.3 - 99.1] | 89.0  | [86.6 - 91.0] | 98.4  | [97.5 - 99.0] | 0.03              |

| Query    | Subject                                   | $d_0$ | C.I. $d_0$    | $d_4$ | C.I. $d_4$    | $d_6$ | C.I. $d_6$    | Diff. G+C Percent |
|----------|-------------------------------------------|-------|---------------|-------|---------------|-------|---------------|-------------------|
| 'KL0796' | 'KL0876'                                  | 94.5  | [92.1 - 96.2] | 89.0  | [86.6 - 91.1] | 95.7  | [94.0 - 97.0] | 0.08              |
| 'KL0515' | 'KL0876'                                  | 98.1  | [96.8 - 98.9] | 89.0  | [86.6 - 91.1] | 98.3  | [97.3 - 98.9] | 0.05              |
| 'KL0825' | 'KL0876'                                  | 97.3  | [95.8 - 98.3] | 89.0  | [86.6 - 91.0] | 97.7  | [96.5 - 98.5] | 0.04              |
| 'KL0483' | 'KL0876'                                  | 95.3  | [93.1 - 96.8] | 89.0  | [86.6 - 91.0] | 96.3  | [94.7 - 97.4] | 0.12              |
| 'KL0840' | 'KL0876'                                  | 98.3  | [97.1 - 99.0] | 89.0  | [86.6 - 91.0] | 98.4  | [97.5 - 99.0] | 0.04              |
| 'KL0541' | <i>Corynebacterium ulcerans</i> NCTC 7910 | 93.3  | [90.6 - 95.2] | 88.9  | [86.5 - 91.0] | 94.8  | [92.9 - 96.3] | 0.05              |
| 'KL0796' | 'KL0870'                                  | 97.2  | [95.6 - 98.3] | 88.9  | [86.5 - 90.9] | 97.6  | [96.4 - 98.4] | 0.02              |
| 'KL0867' | <i>Corynebacterium ulcerans</i> NCTC 7910 | 96.8  | [95.0 - 97.9] | 88.9  | [86.5 - 91.0] | 97.3  | [96.0 - 98.2] | 0.03              |
| 'KL0547' | <i>Corynebacterium ulcerans</i> NCTC 7910 | 95.9  | [93.8 - 97.3] | 88.9  | [86.5 - 91.0] | 96.7  | [95.2 - 97.7] | 0.03              |
| 'KL0547' | 'KL0876'                                  | 95.2  | [93.0 - 96.8] | 88.8  | [86.3 - 90.8] | 96.2  | [94.6 - 97.4] | 0.07              |
| 'KL0541' | 'KL0876'                                  | 92.6  | [89.7 - 94.7] | 88.8  | [86.4 - 90.9] | 94.3  | [92.2 - 95.8] | 0.09              |
| 'KL0497' | 'KL0853'                                  | 96.0  | [94.0 - 97.4] | 88.7  | [86.2 - 90.7] | 96.8  | [95.3 - 97.8] | 0.1               |
| 'KL0867' | 'KL0876'                                  | 96.2  | [94.3 - 97.5] | 88.7  | [86.3 - 90.8] | 96.9  | [95.5 - 97.9] | 0.06              |
| 'KL0540' | <i>Corynebacterium ulcerans</i> NCTC 7910 | 97.9  | [96.6 - 98.8] | 88.7  | [86.3 - 90.8] | 98.1  | [97.1 - 98.8] | 0.05              |
| 'KL0540' | 'KL0876'                                  | 97.4  | [95.9 - 98.4] | 88.6  | [86.2 - 90.7] | 97.7  | [96.6 - 98.5] | 0.08              |
| 'KL0497' | <i>Corynebacterium ulcerans</i> NCTC 7910 | 97.8  | [96.4 - 98.6] | 88.6  | [86.1 - 90.6] | 98.0  | [96.9 - 98.7] | 0.01              |
| 'KL0876' | <i>Corynebacterium ulcerans</i> NCTC 7910 | 97.7  | [96.2 - 98.6] | 88.5  | [86.0 - 90.6] | 97.9  | [96.8 - 98.6] | 0.04              |
| 'KL0853' | <i>Corynebacterium ulcerans</i> NCTC 7910 | 95.3  | [93.1 - 96.8] | 88.5  | [86.1 - 90.6] | 96.2  | [94.6 - 97.4] | 0.1               |
| 'KL0483' | 'KL0870'                                  | 97.4  | [95.9 - 98.4] | 88.4  | [86.0 - 90.5] | 97.7  | [96.5 - 98.5] | 0.03              |
| 'KL0475' | <i>Corynebacterium ulcerans</i> NCTC 7910 | 91.2  | [88.1 - 93.5] | 88.4  | [85.9 - 90.5] | 93.2  | [90.9 - 95.0] | 0.01              |
| 'KL0515' | 'KL0870'                                  | 94.8  | [92.5 - 96.5] | 88.4  | [86.0 - 90.5] | 95.9  | [94.2 - 97.1] | 0.04              |
| 'KL0840' | <i>Corynebacterium ulcerans</i> NCTC 7910 | 98.1  | [96.9 - 98.9] | 88.3  | [85.8 - 90.4] | 98.2  | [97.2 - 98.8] | 0.0               |
| 'KL0846' | <i>Corynebacterium ulcerans</i> NCTC 7910 | 98.0  | [96.7 - 98.8] | 88.3  | [85.8 - 90.4] | 98.1  | [97.1 - 98.8] | 0.0               |
| 'KL0796' | <i>Corynebacterium ulcerans</i> NCTC 7910 | 94.3  | [91.8 - 96.0] | 88.2  | [85.7 - 90.3] | 95.4  | [93.6 - 96.8] | 0.04              |
| 'KL0825' | <i>Corynebacterium ulcerans</i> NCTC 7910 | 97.2  | [95.5 - 98.2] | 88.2  | [85.7 - 90.3] | 97.5  | [96.3 - 98.3] | 0.0               |
| 'KL0832' | <i>Corynebacterium ulcerans</i> NCTC 7910 | 98.2  | [97.0 - 98.9] | 88.2  | [85.7 - 90.3] | 98.3  | [97.3 - 98.9] | 0.0               |
| 'KL0541' | 'KL0870'                                  | 95.3  | [93.1 - 96.8] | 88.2  | [85.7 - 90.3] | 96.2  | [94.5 - 97.3] | 0.0               |

| Query    | Subject                                   | $d_0$ | C.I. $d_0$    | $d_4$ | C.I. $d_4$    | $d_6$ | C.I. $d_6$    | Diff. G+C Percent |
|----------|-------------------------------------------|-------|---------------|-------|---------------|-------|---------------|-------------------|
| 'KL0870' | <i>Corynebacterium ulcerans</i> NCTC 7910 | 94.7  | [92.3 - 96.3] | 88.1  | [85.6 - 90.2] | 95.7  | [94.0 - 97.0] | 0.06              |
| 'KL0483' | <i>Corynebacterium ulcerans</i> NCTC 7910 | 95.2  | [92.9 - 96.7] | 88.0  | [85.5 - 90.1] | 96.1  | [94.4 - 97.3] | 0.08              |
| 'KL0501' | 'KL0876'                                  | 97.8  | [96.3 - 98.6] | 88.0  | [85.5 - 90.1] | 97.9  | [96.8 - 98.6] | 0.03              |
| 'KL0785' | 'KL0870'                                  | 96.2  | [94.2 - 97.5] | 87.9  | [85.4 - 90.1] | 96.8  | [95.3 - 97.8] | 0.0               |
| 'KL0818' | 'KL0870'                                  | 96.3  | [94.3 - 97.6] | 87.9  | [85.4 - 90.0] | 96.8  | [95.4 - 97.9] | 0.01              |
| 'KL0846' | 'KL0853'                                  | 96.2  | [94.3 - 97.5] | 87.9  | [85.3 - 90.0] | 96.8  | [95.3 - 97.8] | 0.09              |
| 'KL0840' | 'KL0853'                                  | 96.4  | [94.5 - 97.6] | 87.9  | [85.4 - 90.0] | 96.9  | [95.5 - 97.9] | 0.1               |
| 'KL0556' | <i>Corynebacterium ulcerans</i> NCTC 7910 | 98.1  | [96.9 - 98.9] | 87.9  | [85.3 - 90.0] | 98.2  | [97.2 - 98.8] | 0.01              |
| 'KL0832' | 'KL0853'                                  | 96.5  | [94.6 - 97.7] | 87.8  | [85.3 - 89.9] | 97.0  | [95.6 - 98.0] | 0.1               |
| 'KL0501' | 'KL0853'                                  | 96.4  | [94.4 - 97.6] | 87.8  | [85.2 - 89.9] | 96.9  | [95.5 - 97.9] | 0.1               |
| 'KL0501' | <i>Corynebacterium ulcerans</i> NCTC 7910 | 97.9  | [96.6 - 98.7] | 87.7  | [85.2 - 89.9] | 98.0  | [96.9 - 98.7] | 0.0               |
| 'KL0825' | 'KL0853'                                  | 95.3  | [93.1 - 96.9] | 87.7  | [85.2 - 89.9] | 96.2  | [94.5 - 97.3] | 0.1               |
| 'KL0497' | 'KL0818'                                  | 96.8  | [95.0 - 98.0] | 87.6  | [85.0 - 89.7] | 97.2  | [95.9 - 98.1] | 0.05              |
| 'KL0497' | 'KL0785'                                  | 96.7  | [94.9 - 97.9] | 87.6  | [85.0 - 89.7] | 97.1  | [95.8 - 98.1] | 0.06              |
| 'KL0556' | 'KL0870'                                  | 95.4  | [93.2 - 96.9] | 87.6  | [85.0 - 89.7] | 96.2  | [94.5 - 97.3] | 0.05              |
| 'KL0497' | 'KL0515'                                  | 97.8  | [96.4 - 98.7] | 87.4  | [84.8 - 89.6] | 97.9  | [96.8 - 98.6] | 0.02              |
| 'KL0475' | 'KL0853'                                  | 92.6  | [89.8 - 94.7] | 87.3  | [84.8 - 89.5] | 94.1  | [92.0 - 95.7] | 0.09              |
| 'KL0540' | 'KL0853'                                  | 95.7  | [93.6 - 97.2] | 87.3  | [84.7 - 89.5] | 96.4  | [94.8 - 97.5] | 0.05              |
| 'KL0556' | 'KL0876'                                  | 97.6  | [96.1 - 98.5] | 87.2  | [84.6 - 89.4] | 97.7  | [96.5 - 98.5] | 0.05              |
| 'KL0867' | 'KL0870'                                  | 94.8  | [92.5 - 96.5] | 87.2  | [84.6 - 89.4] | 95.7  | [94.0 - 97.0] | 0.03              |
| 'KL0547' | 'KL0870'                                  | 94.0  | [91.4 - 95.8] | 87.2  | [84.6 - 89.4] | 95.1  | [93.2 - 96.5] | 0.03              |
| 'KL0853' | 'KL0867'                                  | 95.5  | [93.3 - 97.0] | 87.2  | [84.6 - 89.4] | 96.2  | [94.6 - 97.4] | 0.07              |
| 'KL0541' | 'KL0853'                                  | 94.0  | [91.5 - 95.8] | 87.2  | [84.6 - 89.4] | 95.2  | [93.3 - 96.5] | 0.04              |
| 'KL0818' | 'KL0832'                                  | 97.2  | [95.6 - 98.3] | 87.1  | [84.5 - 89.3] | 97.4  | [96.2 - 98.3] | 0.05              |
| 'KL0785' | 'KL0840'                                  | 97.0  | [95.3 - 98.1] | 87.1  | [84.5 - 89.3] | 97.3  | [96.0 - 98.2] | 0.05              |
| 'KL0515' | 'KL0846'                                  | 97.9  | [96.5 - 98.7] | 87.1  | [84.5 - 89.3] | 97.9  | [96.8 - 98.6] | 0.01              |
| 'KL0796' | 'KL0853'                                  | 95.5  | [93.4 - 97.0] | 87.1  | [84.5 - 89.3] | 96.2  | [94.6 - 97.4] | 0.06              |



| Query    | Subject  | $d_0$ | C.I. $d_0$    | $d_4$ | C.I. $d_4$    | $d_6$ | C.I. $d_6$    | Diff. G+C Percent |
|----------|----------|-------|---------------|-------|---------------|-------|---------------|-------------------|
| 'KL0785' | 'KL0832' | 97.1  | [95.5 - 98.2] | 87.1  | [84.5 - 89.3] | 97.4  | [96.1 - 98.2] | 0.05              |
| 'KL0515' | 'KL0840' | 98.0  | [96.7 - 98.8] | 87.1  | [84.5 - 89.3] | 98.0  | [97.0 - 98.7] | 0.01              |
| 'KL0818' | 'KL0840' | 97.1  | [95.4 - 98.2] | 87.1  | [84.5 - 89.3] | 97.4  | [96.1 - 98.2] | 0.05              |
| 'KL0785' | 'KL0846' | 96.8  | [95.1 - 98.0] | 87.1  | [84.6 - 89.3] | 97.2  | [95.8 - 98.1] | 0.05              |
| 'KL0818' | 'KL0846' | 96.9  | [95.2 - 98.1] | 87.1  | [84.6 - 89.3] | 97.3  | [95.9 - 98.2] | 0.04              |
| 'KL0515' | 'KL0541' | 92.9  | [90.1 - 94.9] | 87.0  | [84.4 - 89.2] | 94.3  | [92.2 - 95.8] | 0.04              |
| 'KL0483' | 'KL0515' | 94.9  | [92.6 - 96.6] | 87.0  | [84.4 - 89.2] | 95.8  | [94.1 - 97.0] | 0.07              |
| 'KL0541' | 'KL0556' | 94.1  | [91.6 - 95.9] | 87.0  | [84.4 - 89.2] | 95.2  | [93.3 - 96.6] | 0.04              |
| 'KL0515' | 'KL0832' | 98.1  | [96.9 - 98.9] | 87.0  | [84.4 - 89.2] | 98.1  | [97.1 - 98.8] | 0.02              |
| 'KL0475' | 'KL0556' | 92.3  | [89.4 - 94.5] | 87.0  | [84.4 - 89.2] | 93.9  | [91.7 - 95.5] | 0.0               |
| 'KL0515' | 'KL0825' | 97.0  | [95.3 - 98.1] | 87.0  | [84.4 - 89.2] | 97.3  | [96.0 - 98.2] | 0.01              |
| 'KL0540' | 'KL0818' | 96.7  | [94.8 - 97.9] | 86.9  | [84.3 - 89.1] | 97.0  | [95.6 - 98.0] | 0.0               |
| 'KL0540' | 'KL0785' | 96.6  | [94.7 - 97.8] | 86.9  | [84.3 - 89.1] | 96.9  | [95.5 - 97.9] | 0.0               |
| 'KL0515' | 'KL0867' | 96.4  | [94.5 - 97.7] | 86.9  | [84.3 - 89.1] | 96.8  | [95.4 - 97.8] | 0.01              |
| 'KL0475' | 'KL0515' | 91.1  | [88.0 - 93.5] | 86.9  | [84.4 - 89.2] | 93.0  | [90.6 - 94.7] | 0.0               |
| 'KL0515' | 'KL0796' | 94.2  | [91.7 - 96.0] | 86.9  | [84.3 - 89.1] | 95.2  | [93.4 - 96.6] | 0.03              |
| 'KL0556' | 'KL0785' | 96.8  | [95.1 - 98.0] | 86.9  | [84.3 - 89.1] | 97.1  | [95.8 - 98.1] | 0.04              |
| 'KL0818' | 'KL0825' | 96.1  | [94.1 - 97.5] | 86.9  | [84.3 - 89.1] | 96.6  | [95.1 - 97.7] | 0.05              |
| 'KL0785' | 'KL0825' | 96.0  | [94.0 - 97.4] | 86.9  | [84.3 - 89.1] | 96.6  | [95.0 - 97.6] | 0.05              |
| 'KL0556' | 'KL0867' | 97.5  | [95.9 - 98.4] | 86.9  | [84.3 - 89.1] | 97.6  | [96.4 - 98.4] | 0.02              |
| 'KL0515' | 'KL0547' | 95.5  | [93.3 - 97.0] | 86.9  | [84.3 - 89.1] | 96.2  | [94.5 - 97.3] | 0.02              |
| 'KL0515' | 'KL0540' | 97.5  | [96.0 - 98.5] | 86.9  | [84.3 - 89.1] | 97.6  | [96.4 - 98.4] | 0.03              |
| 'KL0497' | 'KL0556' | 98.3  | [97.1 - 99.0] | 86.9  | [84.3 - 89.1] | 98.2  | [97.2 - 98.8] | 0.02              |
| 'KL0515' | 'KL0556' | 97.9  | [96.5 - 98.7] | 86.8  | [84.2 - 89.0] | 97.9  | [96.8 - 98.6] | 0.0               |
| 'KL0483' | 'KL0853' | 97.1  | [95.5 - 98.2] | 86.8  | [84.2 - 89.1] | 97.4  | [96.1 - 98.2] | 0.01              |
| 'KL0556' | 'KL0846' | 98.7  | [97.7 - 99.3] | 86.8  | [84.2 - 89.0] | 98.5  | [97.6 - 99.1] | 0.01              |
| 'KL0540' | 'KL0870' | 95.9  | [93.9 - 97.3] | 86.8  | [84.2 - 89.0] | 96.5  | [94.9 - 97.6] | 0.01              |

| Query    | Subject                                  | $d_0$ | C.I. $d_0$    | $d_4$ | C.I. $d_4$    | $d_6$ | C.I. $d_6$    | Diff. G+C Percent |
|----------|------------------------------------------|-------|---------------|-------|---------------|-------|---------------|-------------------|
| 'KL0547' | 'KL0818'                                 | 94.5  | [92.1 - 96.2] | 86.8  | [84.2 - 89.1] | 95.5  | [93.6 - 96.8] | 0.01              |
| 'KL0547' | 'KL0556'                                 | 96.6  | [94.8 - 97.8] | 86.8  | [84.2 - 89.0] | 97.0  | [95.6 - 98.0] | 0.02              |
| 'KL0547' | 'KL0785'                                 | 94.4  | [91.9 - 96.1] | 86.8  | [84.2 - 89.0] | 95.4  | [93.5 - 96.7] | 0.02              |
| 'KL0540' | 'KL0556'                                 | 98.5  | [97.4 - 99.1] | 86.8  | [84.2 - 89.0] | 98.4  | [97.4 - 99.0] | 0.04              |
| 'KL0547' | 'KL0853'                                 | 94.7  | [92.4 - 96.4] | 86.8  | [84.2 - 89.1] | 95.6  | [93.8 - 96.9] | 0.07              |
| 'KL0556' | 'KL0818'                                 | 96.9  | [95.2 - 98.0] | 86.8  | [84.2 - 89.1] | 97.2  | [95.9 - 98.1] | 0.04              |
| 'KL0556' | 'KL0853'                                 | 95.8  | [93.8 - 97.2] | 86.8  | [84.2 - 89.0] | 96.4  | [94.8 - 97.5] | 0.09              |
| 'KL0556' | 'KL0796'                                 | 95.3  | [93.0 - 96.8] | 86.7  | [84.1 - 89.0] | 96.0  | [94.3 - 97.2] | 0.03              |
| 'KL0483' | 'KL0556'                                 | 96.0  | [94.0 - 97.4] | 86.7  | [84.1 - 88.9] | 96.5  | [95.0 - 97.6] | 0.08              |
| 'KL0556' | 'KL0840'                                 | 98.8  | [97.9 - 99.3] | 86.7  | [84.1 - 89.0] | 98.6  | [97.7 - 99.1] | 0.01              |
| 'KL0785' | 'KL0867'                                 | 95.5  | [93.3 - 97.0] | 86.7  | [84.1 - 88.9] | 96.2  | [94.5 - 97.3] | 0.03              |
| 'KL0818' | 'KL0867'                                 | 95.6  | [93.5 - 97.1] | 86.7  | [84.1 - 88.9] | 96.2  | [94.6 - 97.4] | 0.02              |
| 'KL0556' | 'KL0825'                                 | 98.0  | [96.6 - 98.8] | 86.6  | [84.0 - 88.8] | 97.9  | [96.8 - 98.7] | 0.01              |
| 'KL0556' | 'KL0832'                                 | 98.9  | [98.0 - 99.4] | 86.6  | [84.0 - 88.9] | 98.6  | [97.8 - 99.2] | 0.01              |
| 'KL0501' | 'KL0515'                                 | 98.2  | [97.0 - 98.9] | 86.5  | [83.9 - 88.8] | 98.1  | [97.1 - 98.8] | 0.02              |
| 'KL0501' | 'KL0818'                                 | 97.3  | [95.7 - 98.3] | 86.5  | [83.9 - 88.8] | 97.5  | [96.2 - 98.3] | 0.05              |
| 'KL0501' | 'KL0785'                                 | 97.2  | [95.6 - 98.2] | 86.5  | [83.9 - 88.7] | 97.4  | [96.1 - 98.3] | 0.06              |
| 'KL0501' | 'KL0556'                                 | 98.9  | [98.0 - 99.4] | 86.5  | [83.9 - 88.8] | 98.6  | [97.8 - 99.2] | 0.01              |
| 'KL0785' | 'KL0796'                                 | 95.6  | [93.5 - 97.1] | 86.4  | [83.7 - 88.6] | 96.2  | [94.6 - 97.4] | 0.01              |
| 'KL0796' | 'KL0818'                                 | 95.7  | [93.6 - 97.2] | 86.4  | [83.7 - 88.6] | 96.3  | [94.7 - 97.4] | 0.01              |
| 'KL0541' | 'KL0818'                                 | 94.6  | [92.2 - 96.3] | 86.3  | [83.7 - 88.6] | 95.4  | [93.6 - 96.8] | 0.01              |
| 'KL0475' | 'KL0785'                                 | 92.8  | [90.0 - 94.9] | 86.3  | [83.7 - 88.6] | 94.1  | [92.0 - 95.7] | 0.04              |
| 'KL0475' | 'KL0818'                                 | 93.0  | [90.2 - 95.0] | 86.3  | [83.7 - 88.6] | 94.2  | [92.2 - 95.8] | 0.04              |
| 'KL0541' | 'KL0785'                                 | 94.4  | [92.0 - 96.2] | 86.3  | [83.7 - 88.6] | 95.4  | [93.5 - 96.7] | 0.0               |
| 'KL0483' | 'KL0818'                                 | 96.6  | [94.7 - 97.8] | 86.3  | [83.6 - 88.5] | 96.9  | [95.4 - 97.9] | 0.04              |
| 'KL0483' | 'KL0785'                                 | 96.4  | [94.6 - 97.7] | 86.2  | [83.6 - 88.5] | 96.8  | [95.3 - 97.8] | 0.03              |
| 'KL0515' | <i>Corynebacterium silvaticum</i> KL0182 | 91.6  | [88.6 - 93.9] | 41.1  | [38.6 - 43.6] | 81.5  | [78.1 - 84.4] | 1.12              |

| Query    | Subject                                              | $d_0$ | C.I. $d_0$    | $d_4$ | C.I. $d_4$    | $d_6$ | C.I. $d_6$    | Diff. G+C Percent |
|----------|------------------------------------------------------|-------|---------------|-------|---------------|-------|---------------|-------------------|
| 'KL0785' | <i>Corynebacterium silvaticum</i> KL0182             | 90.3  | [87.1 - 92.8] | 41.1  | [38.6 - 43.6] | 80.3  | [76.9 - 83.4] | 1.08              |
| 'KL0876' | <i>Corynebacterium silvaticum</i> KL0182             | 90.9  | [87.8 - 93.3] | 41.1  | [38.6 - 43.6] | 80.9  | [77.5 - 83.8] | 1.17              |
| 'KL0818' | <i>Corynebacterium silvaticum</i> KL0182             | 90.3  | [87.1 - 92.8] | 41.1  | [38.6 - 43.7] | 80.4  | [77.0 - 83.4] | 1.09              |
| 'KL0853' | <i>Corynebacterium silvaticum</i> KL0182             | 87.8  | [84.3 - 90.6] | 41.1  | [38.6 - 43.7] | 78.2  | [74.8 - 81.3] | 1.04              |
| 'KL0832' | <i>Corynebacterium silvaticum</i> KL0182             | 91.6  | [88.6 - 93.9] | 40.9  | [38.4 - 43.5] | 81.4  | [78.0 - 84.3] | 1.14              |
| 'KL0547' | <i>Corynebacterium silvaticum</i> KL0182             | 88.9  | [85.5 - 91.6] | 40.9  | [38.4 - 43.4] | 79.0  | [75.6 - 82.1] | 1.11              |
| 'KL0825' | <i>Corynebacterium silvaticum</i> KL0182             | 90.1  | [86.8 - 92.6] | 40.9  | [38.4 - 43.5] | 80.1  | [76.6 - 83.1] | 1.14              |
| 'KL0501' | <i>Corynebacterium silvaticum</i> KL0182             | 91.5  | [88.5 - 93.8] | 40.9  | [38.4 - 43.4] | 81.3  | [78.0 - 84.3] | 1.14              |
| 'KL0556' | <i>Corynebacterium silvaticum</i> KL0182             | 92.7  | [89.9 - 94.8] | 40.9  | [38.5 - 43.5] | 82.4  | [79.1 - 85.3] | 1.13              |
| 'KL0867' | <i>Corynebacterium silvaticum</i> KL0182             | 90.0  | [86.8 - 92.5] | 40.9  | [38.4 - 43.4] | 80.0  | [76.6 - 83.0] | 1.11              |
| 'KL0497' | <i>Corynebacterium silvaticum</i> KL0182             | 91.4  | [88.3 - 93.7] | 40.9  | [38.4 - 43.4] | 81.2  | [77.8 - 84.1] | 1.14              |
| 'KL0846' | <i>Corynebacterium silvaticum</i> KL0182             | 91.5  | [88.4 - 93.8] | 40.9  | [38.4 - 43.4] | 81.2  | [77.9 - 84.2] | 1.13              |
| 'KL0840' | <i>Corynebacterium silvaticum</i> KL0182             | 91.6  | [88.6 - 93.9] | 40.9  | [38.4 - 43.4] | 81.4  | [78.0 - 84.3] | 1.14              |
| 'KL0870' | <i>Corynebacterium silvaticum</i> KL0182             | 88.5  | [85.1 - 91.3] | 40.9  | [38.4 - 43.4] | 78.7  | [75.3 - 81.8] | 1.08              |
| 'KL0475' | <i>Corynebacterium silvaticum</i> KL0182             | 83.5  | [79.7 - 86.7] | 40.8  | [38.3 - 43.4] | 74.6  | [71.1 - 77.7] | 1.13              |
| 'KL0540' | <i>Corynebacterium silvaticum</i> KL0182             | 91.6  | [88.6 - 93.9] | 40.7  | [38.2 - 43.2] | 81.3  | [77.9 - 84.2] | 1.09              |
| 'KL0483' | <i>Corynebacterium silvaticum</i> KL0182             | 88.2  | [84.7 - 91.0] | 40.7  | [38.2 - 43.3] | 78.4  | [74.9 - 81.4] | 1.05              |
| 'KL0541' | <i>Corynebacterium silvaticum</i> KL0182             | 86.4  | [82.8 - 89.4] | 40.7  | [38.3 - 43.3] | 76.9  | [73.4 - 80.0] | 1.08              |
| 'KL0796' | <i>Corynebacterium silvaticum</i> KL0182             | 87.8  | [84.3 - 90.6] | 40.7  | [38.3 - 43.3] | 78.1  | [74.6 - 81.1] | 1.1               |
| 'KL0832' | <i>Corynebacterium pseudotuberculosis</i> ATCC 19410 | 86.8  | [83.2 - 89.7] | 27.6  | [25.2 - 30.1] | 67.9  | [64.5 - 71.1] | 1.13              |
| 'KL0515' | <i>Corynebacterium pseudotuberculosis</i> ATCC 19410 | 86.7  | [83.1 - 89.6] | 27.6  | [25.2 - 30.0] | 67.8  | [64.3 - 71.0] | 1.14              |
| 'KL0497' | <i>Corynebacterium pseudotuberculosis</i> ATCC 19410 | 86.5  | [82.8 - 89.4] | 27.6  | [25.2 - 30.0] | 67.6  | [64.2 - 70.8] | 1.12              |
| 'KL0840' | <i>Corynebacterium pseudotuberculosis</i> DSM 20689  | 86.8  | [83.2 - 89.7] | 27.6  | [25.2 - 30.1] | 67.9  | [64.4 - 71.1] | 1.13              |
| 'KL0483' | <i>Corynebacterium pseudotuberculosis</i> ATCC 19410 | 82.2  | [78.4 - 85.5] | 27.6  | [25.2 - 30.1] | 64.6  | [61.2 - 67.8] | 1.21              |
| 'KL0818' | <i>Corynebacterium pseudotuberculosis</i> ATCC 19410 | 84.8  | [81.1 - 87.9] | 27.6  | [25.2 - 30.1] | 66.4  | [63.0 - 69.6] | 1.18              |

| Query    | Subject                                              | $d_0$ | C.I. $d_0$    | $d_4$ | C.I. $d_4$    | $d_6$ | C.I. $d_6$    | Diff. G+C Percent |
|----------|------------------------------------------------------|-------|---------------|-------|---------------|-------|---------------|-------------------|
| 'KL0541' | <i>Corynebacterium pseudotuberculosis</i> ATCC 19410 | 80.5  | [76.6 - 84.0] | 27.6  | [25.2 - 30.0] | 63.4  | [60.1 - 66.6] | 1.18              |
| 'KL0832' | <i>Corynebacterium pseudotuberculosis</i> DSM 20689  | 86.8  | [83.2 - 89.7] | 27.6  | [25.2 - 30.1] | 67.9  | [64.5 - 71.1] | 1.12              |
| 'KL0483' | <i>Corynebacterium pseudotuberculosis</i> DSM 20689  | 82.2  | [78.4 - 85.6] | 27.6  | [25.2 - 30.1] | 64.6  | [61.3 - 67.8] | 1.21              |
| 'KL0876' | <i>Corynebacterium pseudotuberculosis</i> ATCC 19410 | 86.5  | [82.8 - 89.4] | 27.6  | [25.3 - 30.1] | 67.7  | [64.2 - 70.9] | 1.09              |
| 'KL0853' | <i>Corynebacterium pseudotuberculosis</i> ATCC 19410 | 83.5  | [79.6 - 86.7] | 27.6  | [25.2 - 30.1] | 65.5  | [62.1 - 68.7] | 1.23              |
| 'KL0556' | <i>Corynebacterium pseudotuberculosis</i> ATCC 19410 | 88.0  | [84.6 - 90.8] | 27.6  | [25.2 - 30.0] | 68.8  | [65.3 - 72.0] | 1.14              |
| 'KL0497' | <i>Corynebacterium pseudotuberculosis</i> DSM 20689  | 86.5  | [82.9 - 89.4] | 27.6  | [25.2 - 30.1] | 67.6  | [64.2 - 70.9] | 1.12              |
| 'KL0853' | <i>Corynebacterium pseudotuberculosis</i> DSM 20689  | 83.6  | [79.8 - 86.8] | 27.6  | [25.2 - 30.1] | 65.6  | [62.2 - 68.8] | 1.22              |
| 'KL0846' | <i>Corynebacterium pseudotuberculosis</i> DSM 20689  | 86.6  | [83.0 - 89.6] | 27.6  | [25.2 - 30.1] | 67.7  | [64.3 - 71.0] | 1.13              |
| 'KL0515' | <i>Corynebacterium pseudotuberculosis</i> DSM 20689  | 86.7  | [83.1 - 89.6] | 27.6  | [25.2 - 30.0] | 67.8  | [64.4 - 71.0] | 1.14              |
| 'KL0796' | <i>Corynebacterium pseudotuberculosis</i> ATCC 19410 | 81.4  | [77.5 - 84.7] | 27.6  | [25.2 - 30.1] | 64.0  | [60.7 - 67.2] | 1.17              |
| 'KL0796' | <i>Corynebacterium pseudotuberculosis</i> DSM 20689  | 81.4  | [77.5 - 84.7] | 27.6  | [25.2 - 30.1] | 64.0  | [60.7 - 67.2] | 1.17              |
| 'KL0870' | <i>Corynebacterium pseudotuberculosis</i> DSM 20689  | 82.6  | [78.8 - 85.9] | 27.6  | [25.3 - 30.1] | 64.9  | [61.5 - 68.1] | 1.18              |
| 'KL0556' | <i>Corynebacterium pseudotuberculosis</i> DSM 20689  | 88.0  | [84.6 - 90.8] | 27.6  | [25.2 - 30.1] | 68.8  | [65.4 - 72.0] | 1.14              |
| 'KL0846' | <i>Corynebacterium pseudotuberculosis</i> ATCC 19410 | 86.6  | [83.0 - 89.6] | 27.6  | [25.2 - 30.1] | 67.7  | [64.3 - 71.0] | 1.13              |
| 'KL0840' | <i>Corynebacterium pseudotuberculosis</i> ATCC 19410 | 86.8  | [83.2 - 89.7] | 27.6  | [25.2 - 30.1] | 67.8  | [64.4 - 71.1] | 1.13              |
| 'KL0825' | <i>Corynebacterium pseudotuberculosis</i> DSM 20689  | 85.1  | [81.4 - 88.2] | 27.6  | [25.2 - 30.1] | 66.7  | [63.3 - 69.9] | 1.13              |
| 'KL0876' | <i>Corynebacterium pseudotuberculosis</i> DSM 20689  | 86.5  | [82.9 - 89.4] | 27.6  | [25.3 - 30.1] | 67.7  | [64.3 - 70.9] | 1.09              |
| 'KL0825' | <i>Corynebacterium pseudotuberculosis</i> ATCC 19410 | 85.1  | [81.4 - 88.2] | 27.6  | [25.2 - 30.1] | 66.7  | [63.3 - 69.9] | 1.13              |
| 'KL0541' | <i>Corynebacterium pseudotuberculosis</i> DSM 20689  | 80.6  | [76.6 - 84.0] | 27.6  | [25.2 - 30.0] | 63.4  | [60.1 - 66.6] | 1.18              |
| 'KL0870' | <i>Corynebacterium pseudotuberculosis</i> ATCC 19410 | 82.6  | [78.8 - 85.9] | 27.6  | [25.2 - 30.1] | 64.9  | [61.5 - 68.1] | 1.19              |

| Query    | Subject                                              | $d_0$ | C.I. $d_0$    | $d_4$ | C.I. $d_4$    | $d_6$ | C.I. $d_6$    | Diff. G+C Percent |
|----------|------------------------------------------------------|-------|---------------|-------|---------------|-------|---------------|-------------------|
| 'KL0818' | <i>Corynebacterium pseudotuberculosis</i> DSM 20689  | 84.9  | [81.2 - 88.0] | 27.6  | [25.2 - 30.1] | 66.5  | [63.1 - 69.7] | 1.17              |
| 'KL0867' | <i>Corynebacterium pseudotuberculosis</i> DSM 20689  | 85.1  | [81.3 - 88.2] | 27.5  | [25.2 - 30.0] | 66.6  | [63.2 - 69.8] | 1.15              |
| 'KL0547' | <i>Corynebacterium pseudotuberculosis</i> DSM 20689  | 83.7  | [79.9 - 86.9] | 27.5  | [25.2 - 30.0] | 65.6  | [62.2 - 68.8] | 1.16              |
| 'KL0867' | <i>Corynebacterium pseudotuberculosis</i> ATCC 19410 | 85.0  | [81.3 - 88.1] | 27.5  | [25.2 - 30.0] | 66.5  | [63.2 - 69.8] | 1.16              |
| 'KL0785' | <i>Corynebacterium pseudotuberculosis</i> ATCC 19410 | 85.3  | [81.6 - 88.4] | 27.5  | [25.2 - 30.0] | 66.7  | [63.3 - 70.0] | 1.18              |
| 'KL0540' | <i>Corynebacterium pseudotuberculosis</i> ATCC 19410 | 86.6  | [83.0 - 89.6] | 27.5  | [25.2 - 30.0] | 67.7  | [64.3 - 70.9] | 1.18              |
| 'KL0785' | <i>Corynebacterium pseudotuberculosis</i> DSM 20689  | 85.4  | [81.7 - 88.5] | 27.5  | [25.2 - 30.0] | 66.8  | [63.4 - 70.1] | 1.18              |
| 'KL0501' | <i>Corynebacterium pseudotuberculosis</i> ATCC 19410 | 86.9  | [83.3 - 89.8] | 27.5  | [25.2 - 30.0] | 67.9  | [64.5 - 71.1] | 1.13              |
| 'KL0547' | <i>Corynebacterium pseudotuberculosis</i> ATCC 19410 | 83.7  | [79.9 - 86.9] | 27.5  | [25.2 - 30.0] | 65.6  | [62.2 - 68.8] | 1.16              |
| 'KL0501' | <i>Corynebacterium pseudotuberculosis</i> DSM 20689  | 86.9  | [83.3 - 89.8] | 27.5  | [25.2 - 30.0] | 67.9  | [64.5 - 71.2] | 1.12              |
| 'KL0540' | <i>Corynebacterium pseudotuberculosis</i> DSM 20689  | 86.6  | [83.0 - 89.6] | 27.5  | [25.2 - 30.0] | 67.7  | [64.3 - 71.0] | 1.17              |
| 'KL0475' | <i>Corynebacterium pseudotuberculosis</i> DSM 20689  | 77.8  | [73.8 - 81.3] | 27.4  | [25.1 - 29.9] | 61.4  | [58.2 - 64.6] | 1.14              |
| 'KL0475' | <i>Corynebacterium pseudotuberculosis</i> ATCC 19410 | 77.8  | [73.8 - 81.3] | 27.4  | [25.1 - 29.9] | 61.4  | [58.1 - 64.6] | 1.14              |
| 'KL0870' | <i>Corynebacterium mustelae</i> DSM 45274            | 12.9  | [10.2 - 16.2] | 25.2  | [22.9 - 27.7] | 13.3  | [11.0 - 16.1] | 0.8               |
| 'KL0876' | <i>Corynebacterium mustelae</i> DSM 45274            | 13.0  | [10.2 - 16.2] | 25.2  | [22.8 - 27.7] | 13.3  | [11.0 - 16.1] | 0.71              |
| 'KL0846' | <i>Corynebacterium mustelae</i> DSM 45274            | 13.0  | [10.2 - 16.2] | 25.2  | [22.8 - 27.6] | 13.3  | [11.0 - 16.1] | 0.74              |
| 'KL0867' | <i>Corynebacterium mustelae</i> DSM 45274            | 13.0  | [10.2 - 16.2] | 25.2  | [22.8 - 27.6] | 13.3  | [11.0 - 16.1] | 0.77              |
| 'KL0540' | <i>Corynebacterium mustelae</i> DSM 45274            | 13.0  | [10.2 - 16.2] | 25.2  | [22.9 - 27.7] | 13.3  | [11.0 - 16.1] | 0.79              |
| 'KL0541' | <i>Corynebacterium mustelae</i> DSM 45274            | 12.9  | [10.2 - 16.2] | 25.2  | [22.8 - 27.6] | 13.3  | [11.0 - 16.1] | 0.79              |
| 'KL0547' | <i>Corynebacterium mustelae</i> DSM 45274            | 12.9  | [10.2 - 16.2] | 25.2  | [22.8 - 27.6] | 13.3  | [11.0 - 16.1] | 0.77              |
| 'KL0853' | <i>Corynebacterium mustelae</i> DSM 45274            | 12.9  | [10.2 - 16.2] | 25.2  | [22.9 - 27.7] | 13.3  | [11.0 - 16.1] | 0.84              |
| 'KL0832' | <i>Corynebacterium mustelae</i> DSM 45274            | 13.0  | [10.2 - 16.2] | 25.2  | [22.9 - 27.7] | 13.3  | [11.0 - 16.1] | 0.74              |
| 'KL0556' | <i>Corynebacterium mustelae</i> DSM 45274            | 13.0  | [10.3 - 16.2] | 25.2  | [22.9 - 27.7] | 13.3  | [11.0 - 16.1] | 0.75              |

| Query    | Subject                                       | $d_0$ | C.I. $d_0$    | $d_4$ | C.I. $d_4$    | $d_6$ | C.I. $d_6$    | Diff. G+C Percent |
|----------|-----------------------------------------------|-------|---------------|-------|---------------|-------|---------------|-------------------|
| 'KL0501' | <i>Corynebacterium mustelae</i> DSM 45274     | 13.0  | [10.2 - 16.2] | 25.2  | [22.9 - 27.7] | 13.3  | [11.0 - 16.1] | 0.74              |
| 'KL0483' | <i>Corynebacterium mustelae</i> DSM 45274     | 12.9  | [10.2 - 16.2] | 25.2  | [22.9 - 27.7] | 13.3  | [11.0 - 16.1] | 0.83              |
| 'KL0825' | <i>Corynebacterium mustelae</i> DSM 45274     | 13.0  | [10.2 - 16.2] | 25.2  | [22.9 - 27.7] | 13.3  | [11.0 - 16.1] | 0.74              |
| 'KL0840' | <i>Corynebacterium mustelae</i> DSM 45274     | 13.0  | [10.2 - 16.2] | 25.2  | [22.9 - 27.7] | 13.3  | [11.0 - 16.1] | 0.74              |
| 'KL0497' | <i>Corynebacterium mustelae</i> DSM 45274     | 13.0  | [10.2 - 16.2] | 25.1  | [22.8 - 27.6] | 13.3  | [11.0 - 16.1] | 0.73              |
| 'KL0796' | <i>Corynebacterium mustelae</i> DSM 45274     | 12.9  | [10.2 - 16.2] | 25.1  | [22.8 - 27.6] | 13.3  | [11.0 - 16.1] | 0.78              |
| 'KL0853' | <i>Corynebacterium vitaeruminis</i> DSM 20294 | 13.2  | [10.5 - 16.5] | 25.0  | [22.7 - 27.5] | 13.6  | [11.2 - 16.3] | 12.12             |
| 'KL0483' | <i>Corynebacterium vitaeruminis</i> DSM 20294 | 13.2  | [10.5 - 16.5] | 25.0  | [22.6 - 27.4] | 13.6  | [11.2 - 16.4] | 12.13             |
| 'KL0876' | <i>Corynebacterium vitaeruminis</i> DSM 20294 | 13.2  | [10.5 - 16.5] | 25.0  | [22.7 - 27.5] | 13.6  | [11.2 - 16.3] | 12.25             |
| 'KL0825' | <i>Corynebacterium vitaeruminis</i> DSM 20294 | 13.2  | [10.5 - 16.5] | 24.9  | [22.6 - 27.4] | 13.6  | [11.2 - 16.4] | 12.21             |
| 'KL0541' | <i>Corynebacterium vitaeruminis</i> DSM 20294 | 13.2  | [10.5 - 16.5] | 24.9  | [22.6 - 27.4] | 13.6  | [11.2 - 16.4] | 12.16             |
| 'KL0846' | <i>Corynebacterium vitaeruminis</i> DSM 20294 | 13.2  | [10.5 - 16.5] | 24.9  | [22.6 - 27.4] | 13.6  | [11.2 - 16.4] | 12.21             |
| 'KL0840' | <i>Corynebacterium vitaeruminis</i> DSM 20294 | 13.2  | [10.5 - 16.5] | 24.9  | [22.6 - 27.4] | 13.6  | [11.2 - 16.4] | 12.21             |
| 'KL0832' | <i>Corynebacterium vitaeruminis</i> DSM 20294 | 13.2  | [10.5 - 16.5] | 24.9  | [22.6 - 27.4] | 13.6  | [11.2 - 16.4] | 12.22             |
| 'KL0870' | <i>Corynebacterium pseudopelargi</i> CCM 8832 | 13.2  | [10.5 - 16.5] | 24.9  | [22.6 - 27.4] | 13.6  | [11.2 - 16.4] | 4.54              |
| 'KL0867' | <i>Corynebacterium vitaeruminis</i> DSM 20294 | 13.2  | [10.5 - 16.5] | 24.8  | [22.5 - 27.3] | 13.6  | [11.2 - 16.4] | 12.19             |
| 'KL0501' | <i>Corynebacterium vitaeruminis</i> DSM 20294 | 13.2  | [10.5 - 16.5] | 24.8  | [22.5 - 27.3] | 13.6  | [11.2 - 16.4] | 12.22             |
| 'KL0547' | <i>Corynebacterium vitaeruminis</i> DSM 20294 | 13.2  | [10.5 - 16.5] | 24.8  | [22.5 - 27.3] | 13.6  | [11.2 - 16.4] | 12.18             |
| 'KL0853' | <i>Corynebacterium pelargi</i> DSM 46737      | 13.2  | [10.5 - 16.5] | 24.7  | [22.4 - 27.1] | 13.6  | [11.2 - 16.3] | 4.76              |
| 'KL0876' | <i>Corynebacterium pseudopelargi</i> CCM 8832 | 13.2  | [10.5 - 16.5] | 24.7  | [22.4 - 27.2] | 13.6  | [11.2 - 16.4] | 4.63              |
| 'KL0515' | <i>Corynebacterium vitaeruminis</i> DSM 20294 | 13.2  | [10.5 - 16.5] | 24.7  | [22.3 - 27.1] | 13.6  | [11.2 - 16.4] | 12.2              |
| 'KL0870' | <i>Corynebacterium vitaeruminis</i> DSM 20294 | 13.2  | [10.5 - 16.5] | 24.7  | [22.4 - 27.1] | 13.6  | [11.2 - 16.4] | 12.16             |
| 'KL0853' | <i>Corynebacterium pseudopelargi</i> CCM 8832 | 13.2  | [10.5 - 16.5] | 24.6  | [22.3 - 27.1] | 13.6  | [11.2 - 16.4] | 4.5               |
| 'KL0556' | <i>Corynebacterium vitaeruminis</i> DSM 20294 | 13.2  | [10.5 - 16.5] | 24.6  | [22.3 - 27.1] | 13.6  | [11.2 - 16.4] | 12.2              |
| 'KL0540' | <i>Corynebacterium vitaeruminis</i> DSM 20294 | 13.2  | [10.5 - 16.5] | 24.6  | [22.3 - 27.0] | 13.6  | [11.2 - 16.4] | 12.17             |
| 'KL0796' | <i>Corynebacterium vitaeruminis</i> DSM 20294 | 13.2  | [10.5 - 16.5] | 24.6  | [22.3 - 27.1] | 13.6  | [11.2 - 16.4] | 12.17             |
| 'KL0840' | <i>Corynebacterium pseudopelargi</i> CCM 8832 | 13.3  | [10.5 - 16.6] | 24.5  | [22.1 - 26.9] | 13.6  | [11.2 - 16.4] | 4.59              |

| Query    | Subject                                       | $d_0$ | C.I. $d_0$    | $d_4$ | C.I. $d_4$    | $d_6$ | C.I. $d_6$    | Diff. G+C Percent |
|----------|-----------------------------------------------|-------|---------------|-------|---------------|-------|---------------|-------------------|
| 'KL0547' | <i>Corynebacterium pseudopelargi</i> CCM 8832 | 13.2  | [10.5 - 16.6] | 24.5  | [22.2 - 26.9] | 13.6  | [11.2 - 16.4] | 4.56              |
| 'KL0825' | <i>Corynebacterium pseudopelargi</i> CCM 8832 | 13.2  | [10.5 - 16.6] | 24.5  | [22.1 - 26.9] | 13.6  | [11.2 - 16.4] | 4.59              |
| 'KL0501' | <i>Corynebacterium pseudopelargi</i> CCM 8832 | 13.3  | [10.5 - 16.6] | 24.5  | [22.2 - 27.0] | 13.6  | [11.3 - 16.4] | 4.6               |
| 'KL0832' | <i>Corynebacterium pseudopelargi</i> CCM 8832 | 13.3  | [10.5 - 16.6] | 24.5  | [22.1 - 26.9] | 13.6  | [11.2 - 16.4] | 4.6               |
| 'KL0501' | <i>Corynebacterium pelargi</i> DSM 46737      | 13.3  | [10.5 - 16.6] | 24.5  | [22.2 - 27.0] | 13.6  | [11.3 - 16.4] | 4.86              |
| 'KL0483' | <i>Corynebacterium pseudopelargi</i> CCM 8832 | 13.2  | [10.5 - 16.5] | 24.5  | [22.2 - 27.0] | 13.6  | [11.2 - 16.4] | 4.51              |
| 'KL0870' | <i>Corynebacterium pelargi</i> DSM 46737      | 13.2  | [10.5 - 16.5] | 24.5  | [22.2 - 26.9] | 13.6  | [11.2 - 16.4] | 4.8               |
| 'KL0497' | <i>Corynebacterium pelargi</i> DSM 46737      | 13.3  | [10.5 - 16.6] | 24.5  | [22.2 - 27.0] | 13.6  | [11.2 - 16.4] | 4.87              |
| 'KL0876' | <i>Corynebacterium pelargi</i> DSM 46737      | 13.2  | [10.5 - 16.5] | 24.5  | [22.1 - 26.9] | 13.6  | [11.2 - 16.4] | 4.9               |
| 'KL0497' | <i>Corynebacterium vitaeruminis</i> DSM 20294 | 13.2  | [10.5 - 16.6] | 24.5  | [22.2 - 27.0] | 13.6  | [11.2 - 16.4] | 12.22             |
| 'KL0541' | <i>Corynebacterium pseudopelargi</i> CCM 8832 | 13.2  | [10.5 - 16.5] | 24.5  | [22.1 - 26.9] | 13.6  | [11.2 - 16.4] | 4.54              |
| 'KL0540' | <i>Corynebacterium pseudopelargi</i> CCM 8832 | 13.3  | [10.5 - 16.6] | 24.5  | [22.2 - 26.9] | 13.6  | [11.2 - 16.4] | 4.55              |
| 'KL0867' | <i>Corynebacterium pelargi</i> DSM 46737      | 13.3  | [10.5 - 16.6] | 24.4  | [22.1 - 26.9] | 13.6  | [11.2 - 16.4] | 4.83              |
| 'KL0785' | <i>Corynebacterium vitaeruminis</i> DSM 20294 | 13.2  | [10.5 - 16.5] | 24.4  | [22.1 - 26.9] | 13.6  | [11.2 - 16.4] | 12.16             |
| 'KL0818' | <i>Corynebacterium vitaeruminis</i> DSM 20294 | 13.2  | [10.5 - 16.5] | 24.4  | [22.1 - 26.9] | 13.6  | [11.2 - 16.4] | 12.17             |
| 'KL0825' | <i>Corynebacterium pelargi</i> DSM 46737      | 13.3  | [10.5 - 16.6] | 24.4  | [22.1 - 26.9] | 13.6  | [11.2 - 16.4] | 4.86              |
| 'KL0840' | <i>Corynebacterium pelargi</i> DSM 46737      | 13.3  | [10.5 - 16.6] | 24.4  | [22.1 - 26.9] | 13.6  | [11.3 - 16.4] | 4.86              |
| 'KL0475' | <i>Corynebacterium mustelae</i> DSM 45274     | 12.8  | [10.1 - 16.1] | 24.4  | [22.1 - 26.9] | 13.2  | [10.8 - 15.9] | 0.75              |
| 'KL0540' | <i>Corynebacterium pelargi</i> DSM 46737      | 13.3  | [10.5 - 16.6] | 24.4  | [22.1 - 26.9] | 13.6  | [11.3 - 16.4] | 4.81              |
| 'KL0846' | <i>Corynebacterium pelargi</i> DSM 46737      | 13.3  | [10.5 - 16.6] | 24.4  | [22.1 - 26.9] | 13.6  | [11.3 - 16.4] | 4.86              |
| 'KL0483' | <i>Corynebacterium pelargi</i> DSM 46737      | 13.3  | [10.5 - 16.6] | 24.4  | [22.1 - 26.9] | 13.6  | [11.2 - 16.4] | 4.78              |
| 'KL0796' | <i>Corynebacterium pelargi</i> DSM 46737      | 13.2  | [10.5 - 16.6] | 24.4  | [22.1 - 26.9] | 13.6  | [11.2 - 16.4] | 4.82              |
| 'KL0541' | <i>Corynebacterium pelargi</i> DSM 46737      | 13.2  | [10.5 - 16.6] | 24.4  | [22.1 - 26.9] | 13.6  | [11.2 - 16.4] | 4.81              |
| 'KL0556' | <i>Corynebacterium kutscheri</i> DSM 20755    | 13.1  | [10.4 - 16.4] | 24.4  | [22.1 - 26.8] | 13.5  | [11.1 - 16.3] | 6.86              |
| 'KL0832' | <i>Corynebacterium pelargi</i> DSM 46737      | 13.3  | [10.5 - 16.6] | 24.4  | [22.1 - 26.9] | 13.6  | [11.3 - 16.4] | 4.86              |
| 'KL0846' | <i>Corynebacterium pseudopelargi</i> CCM 8832 | 13.3  | [10.5 - 16.6] | 24.4  | [22.1 - 26.9] | 13.6  | [11.2 - 16.4] | 4.59              |
| 'KL0547' | <i>Corynebacterium pelargi</i> DSM 46737      | 13.3  | [10.5 - 16.6] | 24.4  | [22.1 - 26.9] | 13.6  | [11.2 - 16.4] | 4.83              |

| Query    | Subject                                       | $d_0$ | C.I. $d_0$    | $d_4$ | C.I. $d_4$    | $d_6$ | C.I. $d_6$    | Diff. G+C Percent |
|----------|-----------------------------------------------|-------|---------------|-------|---------------|-------|---------------|-------------------|
| 'KL0796' | <i>Corynebacterium pseudopelargi</i> CCM 8832 | 13.2  | [10.5 - 16.6] | 24.3  | [21.9 - 26.7] | 13.6  | [11.2 - 16.4] | 4.55              |
| 'KL0497' | <i>Corynebacterium pseudopelargi</i> CCM 8832 | 13.3  | [10.5 - 16.6] | 24.3  | [22.0 - 26.8] | 13.6  | [11.3 - 16.4] | 4.6               |
| 'KL0867' | <i>Corynebacterium pseudopelargi</i> CCM 8832 | 13.3  | [10.5 - 16.6] | 24.3  | [22.0 - 26.7] | 13.6  | [11.2 - 16.4] | 4.57              |
| 'KL0515' | <i>Corynebacterium mustelae</i> DSM 45274     | 13.0  | [10.3 - 16.3] | 24.1  | [21.8 - 26.6] | 13.4  | [11.0 - 16.1] | 0.75              |
| 'KL0818' | <i>Corynebacterium mustelae</i> DSM 45274     | 13.0  | [10.3 - 16.3] | 24.1  | [21.8 - 26.5] | 13.4  | [11.0 - 16.1] | 0.79              |
| 'KL0785' | <i>Corynebacterium mustelae</i> DSM 45274     | 13.0  | [10.3 - 16.3] | 24.1  | [21.8 - 26.5] | 13.4  | [11.0 - 16.1] | 0.79              |
| 'KL0556' | <i>Corynebacterium pseudopelargi</i> CCM 8832 | 13.2  | [10.5 - 16.6] | 24.1  | [21.8 - 26.6] | 13.6  | [11.2 - 16.4] | 4.59              |
| 'KL0515' | <i>Corynebacterium pseudopelargi</i> CCM 8832 | 13.3  | [10.5 - 16.6] | 24.0  | [21.7 - 26.5] | 13.6  | [11.2 - 16.4] | 4.58              |
| 'KL0556' | <i>Corynebacterium pelargi</i> DSM 46737      | 13.3  | [10.5 - 16.6] | 24.0  | [21.7 - 26.5] | 13.6  | [11.3 - 16.4] | 4.85              |
| 'KL0818' | <i>Corynebacterium pseudopelargi</i> CCM 8832 | 13.2  | [10.5 - 16.6] | 24.0  | [21.7 - 26.4] | 13.6  | [11.2 - 16.4] | 4.55              |
| 'KL0785' | <i>Corynebacterium pseudopelargi</i> CCM 8832 | 13.2  | [10.5 - 16.6] | 24.0  | [21.7 - 26.5] | 13.6  | [11.2 - 16.4] | 4.54              |
| 'KL0853' | <i>Corynebacterium kutscheri</i> DSM 20755    | 13.2  | [10.5 - 16.5] | 24.0  | [21.7 - 26.5] | 13.6  | [11.2 - 16.3] | 6.94              |
| 'KL0825' | <i>Corynebacterium kutscheri</i> DSM 20755    | 13.2  | [10.5 - 16.5] | 23.9  | [21.6 - 26.4] | 13.5  | [11.2 - 16.3] | 6.85              |
| 'KL0483' | <i>Corynebacterium kutscheri</i> DSM 20755    | 13.2  | [10.4 - 16.5] | 23.9  | [21.6 - 26.4] | 13.5  | [11.2 - 16.3] | 6.93              |
| 'KL0832' | <i>Corynebacterium kutscheri</i> DSM 20755    | 13.2  | [10.5 - 16.5] | 23.9  | [21.6 - 26.4] | 13.6  | [11.2 - 16.3] | 6.85              |
| 'KL0867' | <i>Corynebacterium kutscheri</i> DSM 20755    | 13.2  | [10.5 - 16.5] | 23.9  | [21.6 - 26.4] | 13.5  | [11.2 - 16.3] | 6.88              |
| 'KL0497' | <i>Corynebacterium kutscheri</i> DSM 20755    | 13.2  | [10.5 - 16.5] | 23.9  | [21.6 - 26.4] | 13.6  | [11.2 - 16.3] | 6.84              |
| 'KL0501' | <i>Corynebacterium kutscheri</i> DSM 20755    | 13.2  | [10.5 - 16.5] | 23.9  | [21.6 - 26.4] | 13.6  | [11.2 - 16.3] | 6.84              |
| 'KL0540' | <i>Corynebacterium kutscheri</i> DSM 20755    | 13.2  | [10.5 - 16.5] | 23.9  | [21.6 - 26.4] | 13.6  | [11.2 - 16.3] | 6.9               |
| 'KL0840' | <i>Corynebacterium kutscheri</i> DSM 20755    | 13.2  | [10.5 - 16.5] | 23.9  | [21.6 - 26.4] | 13.6  | [11.2 - 16.3] | 6.85              |
| 'KL0796' | <i>Corynebacterium kutscheri</i> DSM 20755    | 13.2  | [10.4 - 16.5] | 23.9  | [21.6 - 26.4] | 13.5  | [11.2 - 16.3] | 6.89              |
| 'KL0846' | <i>Corynebacterium kutscheri</i> DSM 20755    | 13.2  | [10.5 - 16.5] | 23.9  | [21.6 - 26.4] | 13.6  | [11.2 - 16.3] | 6.85              |
| 'KL0870' | <i>Corynebacterium kutscheri</i> DSM 20755    | 13.2  | [10.5 - 16.5] | 23.8  | [21.5 - 26.2] | 13.6  | [11.2 - 16.3] | 6.9               |
| 'KL0547' | <i>Corynebacterium kutscheri</i> DSM 20755    | 13.2  | [10.5 - 16.5] | 23.7  | [21.4 - 26.2] | 13.6  | [11.2 - 16.4] | 6.88              |
| 'KL0475' | <i>Corynebacterium phocae</i> DSM 44612       | 12.7  | [10.1 - 16.0] | 23.7  | [21.4 - 26.2] | 13.1  | [10.8 - 15.9] | 5.49              |
| 'KL0541' | <i>Corynebacterium kutscheri</i> DSM 20755    | 13.2  | [10.5 - 16.5] | 23.7  | [21.4 - 26.2] | 13.6  | [11.2 - 16.4] | 6.9               |
| 'KL0515' | <i>Corynebacterium kutscheri</i> DSM 20755    | 13.2  | [10.5 - 16.5] | 23.6  | [21.3 - 26.1] | 13.6  | [11.2 - 16.4] | 6.86              |



| Query    | Subject                                                               | $d_0$ | C.I. $d_0$    | $d_4$ | C.I. $d_4$    | $d_6$ | C.I. $d_6$    | Diff. G+C Percent |
|----------|-----------------------------------------------------------------------|-------|---------------|-------|---------------|-------|---------------|-------------------|
| 'KL0785' | <i>Corynebacterium kutscheri</i> DSM 20755                            | 13.2  | [10.5 - 16.5] | 23.6  | [21.3 - 26.1] | 13.6  | [11.2 - 16.3] | 6.9               |
| 'KL0876' | <i>Corynebacterium kutscheri</i> DSM 20755                            | 13.2  | [10.5 - 16.5] | 23.6  | [21.3 - 26.0] | 13.6  | [11.2 - 16.4] | 6.81              |
| 'KL0818' | <i>Corynebacterium kutscheri</i> DSM 20755                            | 13.2  | [10.5 - 16.5] | 23.6  | [21.3 - 26.1] | 13.6  | [11.2 - 16.3] | 6.89              |
| 'KL0556' | <i>Corynebacterium phocae</i> DSM 44612                               | 12.9  | [10.2 - 16.2] | 23.5  | [21.2 - 25.9] | 13.3  | [10.9 - 16.0] | 5.49              |
| 'KL0475' | <i>Corynebacterium vitaeruminis</i> DSM 20294                         | 13.0  | [10.3 - 16.3] | 23.4  | [21.1 - 25.8] | 13.4  | [11.0 - 16.2] | 12.2              |
| 'KL0475' | <i>Corynebacterium pelargi</i> DSM 46737                              | 13.0  | [10.3 - 16.3] | 23.4  | [21.1 - 25.8] | 13.4  | [11.0 - 16.2] | 4.85              |
| 'KL0785' | <i>Corynebacterium pelargi</i> DSM 46737                              | 13.3  | [10.6 - 16.6] | 23.3  | [21.0 - 25.7] | 13.6  | [11.3 - 16.4] | 4.81              |
| 'KL0515' | <i>Corynebacterium pelargi</i> DSM 46737                              | 13.3  | [10.6 - 16.6] | 23.3  | [21.0 - 25.7] | 13.7  | [11.3 - 16.4] | 4.85              |
| 'KL0876' | <i>Corynebacterium phocae</i> DSM 44612                               | 12.9  | [10.2 - 16.2] | 23.3  | [21.0 - 25.8] | 13.3  | [10.9 - 16.0] | 5.53              |
| 'KL0818' | <i>Corynebacterium pelargi</i> DSM 46737                              | 13.3  | [10.6 - 16.6] | 23.3  | [21.0 - 25.7] | 13.6  | [11.3 - 16.4] | 4.82              |
| 'KL0475' | <i>Corynebacterium kutscheri</i> DSM 20755                            | 12.9  | [10.2 - 16.2] | 23.3  | [21.0 - 25.8] | 13.3  | [11.0 - 16.1] | 6.86              |
| 'KL0853' | <i>Corynebacterium phocae</i> DSM 44612                               | 12.9  | [10.2 - 16.2] | 23.2  | [20.9 - 25.6] | 13.3  | [10.9 - 16.0] | 5.4               |
| 'KL0475' | <i>Corynebacterium pseudopelargi</i> CCM 8832                         | 13.0  | [10.3 - 16.3] | 23.2  | [20.9 - 25.6] | 13.4  | [11.0 - 16.2] | 4.59              |
| 'KL0785' | <i>Corynebacterium phocae</i> DSM 44612                               | 12.9  | [10.2 - 16.2] | 23.2  | [20.9 - 25.6] | 13.3  | [10.9 - 16.0] | 5.45              |
| 'KL0818' | <i>Corynebacterium phocae</i> DSM 44612                               | 12.9  | [10.2 - 16.2] | 23.2  | [20.9 - 25.6] | 13.3  | [10.9 - 16.0] | 5.45              |
| 'KL0853' | <i>Corynebacterium diphtheriae</i> NCTC 11397                         | 14.2  | [11.3 - 17.5] | 23.2  | [20.9 - 25.6] | 14.4  | [12.0 - 17.3] | 0.12              |
| 'KL0515' | <i>Corynebacterium phocae</i> DSM 44612                               | 12.9  | [10.2 - 16.2] | 23.2  | [20.9 - 25.6] | 13.3  | [10.9 - 16.0] | 5.49              |
| 'KL0818' | <i>Corynebacterium diphtheriae</i> NCTC 11397                         | 14.2  | [11.4 - 17.6] | 23.1  | [20.8 - 25.6] | 14.5  | [12.0 - 17.3] | 0.17              |
| 'KL0515' | <i>Corynebacterium diphtheriae</i> NCTC 11397                         | 14.2  | [11.4 - 17.6] | 23.1  | [20.8 - 25.6] | 14.5  | [12.0 - 17.3] | 0.2               |
| 'KL0785' | <i>Corynebacterium diphtheriae</i> NCTC 11397                         | 14.2  | [11.4 - 17.6] | 23.1  | [20.8 - 25.6] | 14.5  | [12.0 - 17.3] | 0.16              |
| 'KL0547' | <i>Corynebacterium phocae</i> DSM 44612                               | 12.9  | [10.2 - 16.2] | 23.0  | [20.7 - 25.5] | 13.3  | [10.9 - 16.0] | 5.47              |
| 'KL0540' | <i>Corynebacterium diphtheriae</i> NCTC 11397                         | 14.2  | [11.4 - 17.6] | 23.0  | [20.7 - 25.4] | 14.5  | [12.0 - 17.3] | 0.16              |
| 'KL0825' | <i>Corynebacterium diphtheriae</i> NCTC 11397                         | 14.2  | [11.4 - 17.6] | 23.0  | [20.7 - 25.4] | 14.5  | [12.0 - 17.3] | 0.21              |
| 'KL0846' | <i>Corynebacterium diphtheriae</i> NCTC 11397                         | 14.2  | [11.4 - 17.6] | 23.0  | [20.7 - 25.4] | 14.5  | [12.0 - 17.3] | 0.21              |
| 'KL0541' | <i>Corynebacterium phocae</i> DSM 44612                               | 12.9  | [10.2 - 16.2] | 23.0  | [20.7 - 25.5] | 13.3  | [10.9 - 16.0] | 5.44              |
| 'KL0832' | <i>Corynebacterium diphtheriae</i> NCTC 11397                         | 14.2  | [11.4 - 17.6] | 23.0  | [20.7 - 25.4] | 14.5  | [12.0 - 17.3] | 0.22              |
| 'KL0515' | <i>Corynebacterium diphtheriae</i> subsp. <i>lausannense</i> CHUV2995 | 14.1  | [11.3 - 17.4] | 23.0  | [20.7 - 25.4] | 14.4  | [11.9 - 17.2] | 0.62              |

| Query    | Subject                                                               | $d_0$ | C.I. $d_0$    | $d_4$ | C.I. $d_4$    | $d_6$ | C.I. $d_6$    | Diff. G+C Percent |
|----------|-----------------------------------------------------------------------|-------|---------------|-------|---------------|-------|---------------|-------------------|
| 'KL0870' | <i>Corynebacterium diphtheriae</i> NCTC 11397                         | 14.2  | [11.4 - 17.6] | 23.0  | [20.7 - 25.5] | 14.5  | [12.0 - 17.3] | 0.16              |
| 'KL0840' | <i>Corynebacterium diphtheriae</i> NCTC 11397                         | 14.2  | [11.4 - 17.6] | 23.0  | [20.7 - 25.4] | 14.5  | [12.0 - 17.3] | 0.21              |
| 'KL0483' | <i>Corynebacterium diphtheriae</i> NCTC 11397                         | 14.2  | [11.3 - 17.5] | 23.0  | [20.7 - 25.4] | 14.4  | [12.0 - 17.3] | 0.13              |
| 'KL0556' | <i>Corynebacterium diphtheriae</i> NCTC 11397                         | 14.2  | [11.4 - 17.6] | 23.0  | [20.7 - 25.4] | 14.5  | [12.0 - 17.3] | 0.2               |
| 'KL0867' | <i>Corynebacterium phocae</i> DSM 44612                               | 12.9  | [10.2 - 16.2] | 23.0  | [20.7 - 25.5] | 13.3  | [10.9 - 16.0] | 5.47              |
| 'KL0796' | <i>Corynebacterium diphtheriae</i> NCTC 11397                         | 14.2  | [11.4 - 17.5] | 22.9  | [20.7 - 25.4] | 14.4  | [12.0 - 17.3] | 0.17              |
| 'KL0497' | <i>Corynebacterium diphtheriae</i> NCTC 11397                         | 14.2  | [11.4 - 17.6] | 22.9  | [20.6 - 25.4] | 14.5  | [12.0 - 17.3] | 0.22              |
| 'KL0501' | <i>Corynebacterium diphtheriae</i> NCTC 11397                         | 14.2  | [11.4 - 17.6] | 22.9  | [20.6 - 25.4] | 14.5  | [12.0 - 17.3] | 0.22              |
| 'KL0870' | <i>Corynebacterium diphtheriae</i> subsp. <i>lausannense</i> CHUV2995 | 14.3  | [11.5 - 17.7] | 22.9  | [20.6 - 25.4] | 14.6  | [12.1 - 17.4] | 0.57              |
| 'KL0501' | <i>Corynebacterium phocae</i> DSM 44612                               | 12.9  | [10.2 - 16.2] | 22.9  | [20.7 - 25.4] | 13.3  | [10.9 - 16.0] | 5.5               |
| 'KL0785' | <i>Corynebacterium diphtheriae</i> subsp. <i>lausannense</i> CHUV2995 | 14.1  | [11.3 - 17.4] | 22.9  | [20.6 - 25.4] | 14.4  | [11.9 - 17.2] | 0.58              |
| 'KL0870' | <i>Corynebacterium phocae</i> DSM 44612                               | 12.9  | [10.2 - 16.2] | 22.9  | [20.7 - 25.4] | 13.3  | [10.9 - 16.0] | 5.44              |
| 'KL0846' | <i>Corynebacterium phocae</i> DSM 44612                               | 12.9  | [10.2 - 16.2] | 22.9  | [20.6 - 25.4] | 13.3  | [10.9 - 16.0] | 5.5               |
| 'KL0870' | <i>Corynebacterium rouxii</i> FRC0190 T                               | 14.5  | [11.7 - 17.9] | 22.9  | [20.6 - 25.4] | 14.7  | [12.3 - 17.6] | 0.14              |
| 'KL0818' | <i>Corynebacterium diphtheriae</i> subsp. <i>lausannense</i> CHUV2995 | 14.1  | [11.3 - 17.4] | 22.9  | [20.6 - 25.4] | 14.4  | [11.9 - 17.2] | 0.58              |
| 'KL0547' | <i>Corynebacterium diphtheriae</i> NCTC 11397                         | 14.2  | [11.4 - 17.6] | 22.9  | [20.6 - 25.4] | 14.5  | [12.0 - 17.3] | 0.18              |
| 'KL0876' | <i>Corynebacterium diphtheriae</i> NCTC 11397                         | 14.2  | [11.4 - 17.6] | 22.9  | [20.7 - 25.4] | 14.5  | [12.1 - 17.4] | 0.25              |
| 'KL0497' | <i>Corynebacterium phocae</i> DSM 44612                               | 12.9  | [10.2 - 16.2] | 22.8  | [20.5 - 25.3] | 13.3  | [10.9 - 16.0] | 5.51              |
| 'KL0540' | <i>Corynebacterium rouxii</i> FRC0190 T                               | 14.5  | [11.6 - 17.9] | 22.8  | [20.5 - 25.2] | 14.7  | [12.3 - 17.6] | 0.13              |
| 'KL0541' | <i>Corynebacterium diphtheriae</i> NCTC 11397                         | 14.1  | [11.3 - 17.5] | 22.8  | [20.5 - 25.3] | 14.4  | [12.0 - 17.3] | 0.16              |
| 'KL0867' | <i>Corynebacterium diphtheriae</i> NCTC 11397                         | 14.2  | [11.4 - 17.6] | 22.8  | [20.5 - 25.3] | 14.5  | [12.0 - 17.3] | 0.19              |
| 'KL0483' | <i>Corynebacterium rouxii</i> FRC0190 T                               | 14.4  | [11.6 - 17.8] | 22.8  | [20.5 - 25.2] | 14.7  | [12.2 - 17.5] | 0.17              |
| 'KL0796' | <i>Corynebacterium rouxii</i> FRC0190 T                               | 14.5  | [11.6 - 17.9] | 22.8  | [20.6 - 25.3] | 14.7  | [12.3 - 17.6] | 0.12              |
| 'KL0483' | <i>Corynebacterium phocae</i> DSM 44612                               | 12.9  | [10.2 - 16.2] | 22.8  | [20.5 - 25.2] | 13.3  | [10.9 - 16.0] | 5.41              |
| 'KL0540' | <i>Corynebacterium phocae</i> DSM 44612                               | 12.9  | [10.2 - 16.2] | 22.8  | [20.6 - 25.3] | 13.3  | [10.9 - 16.0] | 5.45              |
| 'KL0497' | <i>Corynebacterium rouxii</i> FRC0190 T                               | 14.4  | [11.6 - 17.8] | 22.7  | [20.5 - 25.2] | 14.7  | [12.2 - 17.5] | 0.08              |

| Query    | Subject                                                                  | $d_0$ | C.I. $d_0$    | $d_4$ | C.I. $d_4$    | $d_6$ | C.I. $d_6$    | Diff. G+C Percent |
|----------|--------------------------------------------------------------------------|-------|---------------|-------|---------------|-------|---------------|-------------------|
| 'KL0832' | <i>Corynebacterium phocae</i><br>DSM 44612                               | 12.9  | [10.2 - 16.2] | 22.7  | [20.4 - 25.2] | 13.3  | [10.9 - 16.1] | 5.5               |
| 'KL0556' | <i>Corynebacterium rouxii</i><br>FRC0190 T                               | 14.3  | [11.5 - 17.7] | 22.7  | [20.4 - 25.1] | 14.6  | [12.1 - 17.4] | 0.09              |
| 'KL0796' | <i>Corynebacterium phocae</i><br>DSM 44612                               | 12.9  | [10.2 - 16.2] | 22.7  | [20.5 - 25.2] | 13.3  | [10.9 - 16.0] | 5.46              |
| 'KL0541' | <i>Corynebacterium rouxii</i><br>FRC0190 T                               | 14.6  | [11.7 - 18.0] | 22.7  | [20.4 - 25.1] | 14.8  | [12.3 - 17.7] | 0.14              |
| 'KL0515' | <i>Corynebacterium rouxii</i><br>FRC0190 T                               | 14.3  | [11.5 - 17.7] | 22.7  | [20.4 - 25.1] | 14.6  | [12.1 - 17.4] | 0.1               |
| 'KL0825' | <i>Corynebacterium phocae</i><br>DSM 44612                               | 12.9  | [10.2 - 16.2] | 22.7  | [20.5 - 25.2] | 13.3  | [10.9 - 16.0] | 5.5               |
| 'KL0785' | <i>Corynebacterium rouxii</i><br>FRC0190 T                               | 14.3  | [11.5 - 17.7] | 22.7  | [20.5 - 25.2] | 14.5  | [12.1 - 17.4] | 0.14              |
| 'KL0818' | <i>Corynebacterium rouxii</i><br>FRC0190 T                               | 14.3  | [11.5 - 17.7] | 22.7  | [20.4 - 25.2] | 14.5  | [12.1 - 17.4] | 0.13              |
| 'KL0840' | <i>Corynebacterium phocae</i><br>DSM 44612                               | 12.9  | [10.2 - 16.2] | 22.7  | [20.4 - 25.2] | 13.3  | [10.9 - 16.1] | 5.5               |
| 'KL0547' | <i>Corynebacterium rouxii</i><br>FRC0190 T                               | 14.5  | [11.7 - 17.9] | 22.6  | [20.3 - 25.1] | 14.8  | [12.3 - 17.6] | 0.11              |
| 'KL0853' | <i>Corynebacterium diphtheriae</i> subsp.<br><i>lausannense</i> CHUV2995 | 14.1  | [11.3 - 17.5] | 22.6  | [20.3 - 25.0] | 14.4  | [12.0 - 17.2] | 0.53              |
| 'KL0853' | <i>Corynebacterium rouxii</i><br>FRC0190 T                               | 14.4  | [11.6 - 17.8] | 22.6  | [20.3 - 25.0] | 14.7  | [12.2 - 17.5] | 0.18              |
| 'KL0547' | <i>Corynebacterium diphtheriae</i> subsp.<br><i>lausannense</i> CHUV2995 | 14.2  | [11.3 - 17.5] | 22.6  | [20.3 - 25.0] | 14.4  | [12.0 - 17.3] | 0.6               |
| 'KL0796' | <i>Corynebacterium diphtheriae</i> subsp.<br><i>lausannense</i> CHUV2995 | 14.2  | [11.4 - 17.6] | 22.6  | [20.3 - 25.1] | 14.5  | [12.1 - 17.3] | 0.59              |
| 'KL0867' | <i>Corynebacterium rouxii</i><br>FRC0190 T                               | 14.4  | [11.6 - 17.8] | 22.6  | [20.3 - 25.0] | 14.7  | [12.2 - 17.5] | 0.11              |
| 'KL0501' | <i>Corynebacterium rouxii</i><br>FRC0190 T                               | 14.4  | [11.6 - 17.8] | 22.5  | [20.2 - 24.9] | 14.6  | [12.2 - 17.5] | 0.08              |
| 'KL0556' | <i>Corynebacterium diphtheriae</i> subsp.<br><i>lausannense</i> CHUV2995 | 14.2  | [11.3 - 17.5] | 22.5  | [20.2 - 24.9] | 14.4  | [12.0 - 17.3] | 0.62              |
| 'KL0846' | <i>Corynebacterium rouxii</i><br>FRC0190 T                               | 14.4  | [11.6 - 17.8] | 22.5  | [20.3 - 25.0] | 14.7  | [12.2 - 17.5] | 0.09              |
| 'KL0497' | <i>Corynebacterium diphtheriae</i> subsp.<br><i>lausannense</i> CHUV2995 | 14.2  | [11.4 - 17.6] | 22.5  | [20.2 - 24.9] | 14.5  | [12.0 - 17.3] | 0.64              |
| 'KL0832' | <i>Corynebacterium rouxii</i><br>FRC0190 T                               | 14.4  | [11.6 - 17.8] | 22.5  | [20.2 - 25.0] | 14.7  | [12.2 - 17.5] | 0.08              |
| 'KL0840' | <i>Corynebacterium rouxii</i><br>FRC0190 T                               | 14.4  | [11.6 - 17.8] | 22.5  | [20.3 - 25.0] | 14.7  | [12.2 - 17.5] | 0.08              |
| 'KL0825' | <i>Corynebacterium rouxii</i><br>FRC0190 T                               | 14.4  | [11.6 - 17.8] | 22.5  | [20.2 - 25.0] | 14.6  | [12.2 - 17.5] | 0.08              |
| 'KL0870' | <i>Corynebacterium belfantii</i><br>FRC0043                              | 14.3  | [11.5 - 17.7] | 22.5  | [20.2 - 25.0] | 14.6  | [12.1 - 17.4] | 0.26              |
| 'KL0867' | <i>Corynebacterium diphtheriae</i> subsp.<br><i>lausannense</i> CHUV2995 | 14.2  | [11.3 - 17.5] | 22.5  | [20.2 - 24.9] | 14.4  | [12.0 - 17.3] | 0.6               |
| 'KL0501' | <i>Corynebacterium diphtheriae</i> subsp.<br><i>lausannense</i> CHUV2995 | 14.2  | [11.3 - 17.5] | 22.4  | [20.1 - 24.8] | 14.4  | [12.0 - 17.3] | 0.63              |

| Query    | Subject                                                               | $d_0$ | C.I. $d_0$    | $d_4$ | C.I. $d_4$    | $d_6$ | C.I. $d_6$    | Diff. G+C Percent |
|----------|-----------------------------------------------------------------------|-------|---------------|-------|---------------|-------|---------------|-------------------|
| 'KL0515' | <i>Corynebacterium belfantii</i> FRC0043                              | 14.1  | [11.3 - 17.5] | 22.4  | [20.1 - 24.8] | 14.4  | [12.0 - 17.2] | 0.3               |
| 'KL0483' | <i>Corynebacterium diphtheriae</i> subsp. <i>lausannense</i> CHUV2995 | 14.2  | [11.4 - 17.6] | 22.4  | [20.1 - 24.8] | 14.5  | [12.0 - 17.3] | 0.54              |
| 'KL0840' | <i>Corynebacterium diphtheriae</i> subsp. <i>lausannense</i> CHUV2995 | 14.1  | [11.3 - 17.5] | 22.4  | [20.2 - 24.9] | 14.4  | [12.0 - 17.3] | 0.63              |
| 'KL0541' | <i>Corynebacterium diphtheriae</i> subsp. <i>lausannense</i> CHUV2995 | 14.2  | [11.4 - 17.6] | 22.4  | [20.1 - 24.9] | 14.5  | [12.0 - 17.3] | 0.58              |
| 'KL0818' | <i>Corynebacterium belfantii</i> FRC0043                              | 14.1  | [11.3 - 17.5] | 22.4  | [20.1 - 24.8] | 14.4  | [12.0 - 17.2] | 0.27              |
| 'KL0825' | <i>Corynebacterium diphtheriae</i> subsp. <i>lausannense</i> CHUV2995 | 14.1  | [11.3 - 17.5] | 22.4  | [20.2 - 24.9] | 14.4  | [12.0 - 17.2] | 0.63              |
| 'KL0832' | <i>Corynebacterium diphtheriae</i> subsp. <i>lausannense</i> CHUV2995 | 14.1  | [11.3 - 17.5] | 22.4  | [20.2 - 24.9] | 14.4  | [12.0 - 17.3] | 0.63              |
| 'KL0846' | <i>Corynebacterium diphtheriae</i> subsp. <i>lausannense</i> CHUV2995 | 14.2  | [11.3 - 17.5] | 22.4  | [20.2 - 24.9] | 14.4  | [12.0 - 17.3] | 0.63              |
| 'KL0785' | <i>Corynebacterium belfantii</i> FRC0043                              | 14.1  | [11.3 - 17.5] | 22.4  | [20.1 - 24.8] | 14.4  | [12.0 - 17.2] | 0.26              |
| 'KL0876' | <i>Corynebacterium rouxii</i> FRC0190 T                               | 14.4  | [11.5 - 17.7] | 22.4  | [20.2 - 24.9] | 14.6  | [12.2 - 17.4] | 0.05              |
| 'KL0876' | <i>Corynebacterium diphtheriae</i> subsp. <i>lausannense</i> CHUV2995 | 14.2  | [11.4 - 17.5] | 22.4  | [20.1 - 24.9] | 14.4  | [12.0 - 17.3] | 0.66              |
| 'KL0540' | <i>Corynebacterium diphtheriae</i> subsp. <i>lausannense</i> CHUV2995 | 14.2  | [11.4 - 17.6] | 22.3  | [20.1 - 24.8] | 14.5  | [12.1 - 17.3] | 0.58              |
| 'KL0853' | <i>Corynebacterium belfantii</i> FRC0043                              | 14.2  | [11.3 - 17.5] | 22.2  | [19.9 - 24.6] | 14.4  | [12.0 - 17.3] | 0.22              |
| 'KL0796' | <i>Corynebacterium belfantii</i> FRC0043                              | 14.3  | [11.4 - 17.6] | 22.1  | [19.8 - 24.5] | 14.5  | [12.1 - 17.4] | 0.27              |
| 'KL0825' | <i>Corynebacterium belfantii</i> FRC0043                              | 14.2  | [11.3 - 17.5] | 22.0  | [19.7 - 24.4] | 14.4  | [12.0 - 17.3] | 0.31              |
| 'KL0547' | <i>Corynebacterium belfantii</i> FRC0043                              | 14.2  | [11.4 - 17.6] | 22.0  | [19.7 - 24.4] | 14.5  | [12.0 - 17.3] | 0.28              |
| 'KL0832' | <i>Corynebacterium belfantii</i> FRC0043                              | 14.2  | [11.4 - 17.6] | 22.0  | [19.7 - 24.4] | 14.4  | [12.0 - 17.3] | 0.32              |
| 'KL0876' | <i>Corynebacterium belfantii</i> FRC0043                              | 14.2  | [11.4 - 17.6] | 22.0  | [19.7 - 24.4] | 14.5  | [12.0 - 17.3] | 0.35              |
| 'KL0840' | <i>Corynebacterium belfantii</i> FRC0043                              | 14.2  | [11.4 - 17.6] | 22.0  | [19.7 - 24.4] | 14.4  | [12.0 - 17.3] | 0.31              |
| 'KL0846' | <i>Corynebacterium belfantii</i> FRC0043                              | 14.2  | [11.4 - 17.6] | 22.0  | [19.7 - 24.4] | 14.4  | [12.0 - 17.3] | 0.31              |
| 'KL0867' | <i>Corynebacterium belfantii</i> FRC0043                              | 14.2  | [11.4 - 17.6] | 21.9  | [19.7 - 24.4] | 14.5  | [12.0 - 17.3] | 0.29              |
| 'KL0501' | <i>Corynebacterium belfantii</i> FRC0043                              | 14.2  | [11.4 - 17.6] | 21.9  | [19.7 - 24.4] | 14.4  | [12.0 - 17.3] | 0.32              |
| 'KL0483' | <i>Corynebacterium belfantii</i> FRC0043                              | 14.2  | [11.4 - 17.6] | 21.9  | [19.7 - 24.4] | 14.5  | [12.0 - 17.3] | 0.23              |
| 'KL0541' | <i>Corynebacterium belfantii</i> FRC0043                              | 14.2  | [11.4 - 17.6] | 21.9  | [19.7 - 24.4] | 14.5  | [12.0 - 17.3] | 0.26              |
| 'KL0556' | <i>Corynebacterium belfantii</i> FRC0043                              | 14.2  | [11.4 - 17.6] | 21.9  | [19.7 - 24.4] | 14.5  | [12.0 - 17.3] | 0.3               |

| Query    | Subject                                                               | $d_0$ | C.I. $d_0$    | $d_4$ | C.I. $d_4$    | $d_6$ | C.I. $d_6$    | Diff. G+C Percent |
|----------|-----------------------------------------------------------------------|-------|---------------|-------|---------------|-------|---------------|-------------------|
| 'KL0475' | <i>Corynebacterium diphtheriae</i> NCTC 11397                         | 13.9  | [11.1 - 17.3] | 21.9  | [19.6 - 24.3] | 14.2  | [11.8 - 17.0] | 0.2               |
| 'KL0497' | <i>Corynebacterium belfantii</i> FRC0043                              | 14.2  | [11.4 - 17.6] | 21.9  | [19.7 - 24.4] | 14.5  | [12.1 - 17.3] | 0.32              |
| 'KL0540' | <i>Corynebacterium belfantii</i> FRC0043                              | 14.3  | [11.5 - 17.7] | 21.8  | [19.6 - 24.3] | 14.5  | [12.1 - 17.4] | 0.27              |
| 'KL0475' | <i>Corynebacterium diphtheriae</i> subsp. <i>lausannense</i> CHUV2995 | 14.0  | [11.2 - 17.3] | 21.7  | [19.4 - 24.1] | 14.2  | [11.8 - 17.1] | 0.62              |
| 'KL0475' | <i>Corynebacterium rouxii</i> FRC0190 T                               | 14.2  | [11.4 - 17.6] | 21.6  | [19.3 - 24.0] | 14.4  | [12.0 - 17.3] | 0.09              |
| 'KL0475' | <i>Corynebacterium belfantii</i> FRC0043                              | 14.0  | [11.2 - 17.3] | 21.0  | [18.7 - 23.4] | 14.2  | [11.8 - 17.1] | 0.31              |

**Table 4: Strains in your dataset**

Joint dataset of automatically determined closest type strains (if this mode was chosen), manually selected type strains (if selected accordingly) and the provided user strains, if provided (marked in **yellow**).

| Strain                                                                | Authority                                  | Other deposits                                                                                        | Synonyms                                                                                                   | Base pairs | Percent G+C | No. proteins | Goldstamp | Bioproject accession | Biosample accession | Assembly accession | IMG OID    |
|-----------------------------------------------------------------------|--------------------------------------------|-------------------------------------------------------------------------------------------------------|------------------------------------------------------------------------------------------------------------|------------|-------------|--------------|-----------|----------------------|---------------------|--------------------|------------|
| <i>Corynebacterium vitaeruminis</i> DSM 20294                         | (Bechdel et al. 1928) Lanéelle et al. 1980 | CCUG 28792; ATCC 10234; JCM 1323; IFO 12143; NBRC 12143; VKM B-1211; CIP 82.07; NCIB 9291; NCIMB 9291 | <i>Brevibacterium vitaeruminis</i> ; <i>Corynebacterium vitaeruminis</i> ; <i>Flavobacterium vitarumen</i> | 2931780    | 65.5        | 2577         | Gp0023683 | PRJNA172966          | SAMN03081455        | GCA_000550805      | 2558860221 |
| <i>Corynebacterium diphtheriae</i> subsp. <i>lausannense</i> CHUV2995 | Tagini et al. 2019                         | CCUG 72509; DSM 107520                                                                                | <i>Corynebacterium diphtheriae</i> subsp. <i>lausannense</i>                                               | 3060363    | 53.9        | 3145         | Gp0442955 | PRJEB24256           | SAMEA104679569      | GCA_900312965      |            |
| <i>Corynebacterium belfantii</i> FRC0043                              | Dazas et al. 2018                          | DSM 105776; CIP 111412                                                                                | <i>Corynebacterium belfantii</i>                                                                           | 2598827    | 53.6        | 2557         | Gp0364753 | PRJEB22103           | SAMEA104208677      | GCA_900205605      |            |
| <i>Corynebacterium phocae</i> DSM 44612                               | Pascual et al. 1998                        | CCUG 38205; JCM 12105; CIP 105741; strain M408/89/1                                                   | <i>Corynebacterium phocae</i>                                                                              | 2791853    | 58.8        | 2246         | Gp0118686 | PRJNA242582          | SAMN02996498        | GCA_001941565      |            |
| <i>Corynebacterium silvaticum</i> KL0182                              | Dangel et al. 2020                         | LMG 31313; DSM 109166; CIP 111672                                                                     | <i>Corynebacterium silvaticum</i>                                                                          | 2548487    | 54.4        | 2017         |           | PRJNA517029          | SAMN10039578        | GCA_004382825      |            |
| <i>Corynebacterium pseudopelargi</i> CCM 8832                         | Busse et al. 2019                          | 812CH; LMG 30627; CCUG 72167                                                                          | <i>Corynebacterium pseudopelargi</i>                                                                       | 2348160    | 57.9        | 2199         | Gp0379416 | PRJNA224116          | SAMN08449372        | GCF_003814005      |            |

| Strain                                               | Authority                                                | Other deposits                                                                           | Synonyms                                                                       | Base pairs | Percent G+C | No. proteins | Goldstamp | Bioproject accession | Biosample accession | Assembly accession | IMG OID    |
|------------------------------------------------------|----------------------------------------------------------|------------------------------------------------------------------------------------------|--------------------------------------------------------------------------------|------------|-------------|--------------|-----------|----------------------|---------------------|--------------------|------------|
| <i>Corynebacterium rouxii</i> FRC0190 T              | Badell et al. 2020                                       | DSM 110354; CIP 111752                                                                   | <i>Corynebacterium rouxii</i>                                                  | 2451 019   | 53.2        | 2365         |           | PRJNA224116          | SAMEA5992727        | GCF_902702935      |            |
| <i>Corynebacterium pelargi</i> DSM 46737             | Kämpfer et al. 2015                                      | 136/3; LMG 28174; CCM 8517; CIP 110778                                                   | <i>Corynebacterium pelargi</i>                                                 | 2370 060   | 58.2        | 2169         | Gp0442046 | PRJNA224116          | SAMN06041739        | GCA_004114895      |            |
| <i>Corynebacterium pseudotuberculosis</i> ATCC 19410 | (Buchanan 1911) Ebersson 1918 emend. Nouioui et al. 2018 | CCUG 2806; DSM 20689; ATCC 19410; NCTC 3450; JCM 9389; IFO 15363; NBRC 15363; CIP 102968 | <i>Bacillus pseudotuberculosis</i> ; <i>Corynebacterium pseudotuberculosis</i> | 2337 763   | 52.2        | 2146         | Gp0223239 | PRJNA382169          | SAMN06701041        | GCA_002155265      |            |
| <i>Corynebacterium pseudotuberculosis</i> DSM 20689  | (Buchanan 1911) Ebersson 1918 emend. Nouioui et al. 2018 | CCUG 2806; DSM 20689; ATCC 19410; NCTC 3450; JCM 9389; IFO 15363; NBRC 15363; CIP 102968 | <i>Bacillus pseudotuberculosis</i> ; <i>Corynebacterium pseudotuberculosis</i> | 2338 546   | 52.2        | 2084         | Gp0220522 | PRJNA442833          | SAMN08778220        | GCA_003634885      | 2756170169 |
| <i>Corynebacterium ulcerans</i> NCTC 7910            | (ex Gilbert and Stewart 1927) Riegel et al. 1995         | CCUG 2708; DSM 46325; ATCC 51799; JCM 10387; CIP 106504                                  | <i>Corynebacterium ulcerans</i>                                                | 2453 761   | 53.3        | 2178         | Gp0262745 | PRJEB6403            | SAMEA4504038        | GCA_900187135      |            |

| Strain                                        | Authority                                                        | Other deposits                                                                  | Synonyms                                                                                                                        | Base pairs | Percent G+C | No. proteins | Goldstamp | Bioproject accession | Biosample accession | Assembly accession | IMG OID |
|-----------------------------------------------|------------------------------------------------------------------|---------------------------------------------------------------------------------|---------------------------------------------------------------------------------------------------------------------------------|------------|-------------|--------------|-----------|----------------------|---------------------|--------------------|---------|
| <i>Corynebacterium kutscheri</i> DSM 20755    | (Migula 1900) Bergey et al. 1925 emend. Nouioui et al. 2018      | CCUG 27535; ATCC 15677; NCTC 11138; JCM 9385; IFO 15288; NBRC 15288; CIP 103423 | <i>Bacterium kutscheri</i> ; <i>Corynebacterium kutscheri</i>                                                                   | 2354 065   | 46.5        | 2047         | Gp0110293 | PRJNA276037          | SAMN03365283        | GCA_000980835      |         |
| <i>Corynebacterium mustelae</i> DSM 45274     | Funke et al. 2010 emend. Nouioui et al. 2018                     | 3105; CCUG 57279                                                                | <i>Corynebacterium mustelae</i>                                                                                                 | 3474 226   | 52.6        | 3110         | Gp0114696 | PRJNA282348          | SAMN03568800        | GCA_001020985      |         |
| <i>Corynebacterium diphtheriae</i> NCTC 11397 | (Kruse 1886) Lehmann and Neumann 1896 emend. Nouioui et al. 2018 | DSM 44123; ATCC 27010; CIP 100721                                               | <i>Bacillus diphtheriae</i> ; <i>Corynebacterium diphtheriae</i> ; <i>Corynebacterium diphtheriae</i> subsp. <i>diphtheriae</i> | 2463 666   | 53.5        | 2337         | Gp0132011 | PRJEB6403            | SAMEA2517360        | GCA_001457455      |         |
| KL0475                                        |                                                                  |                                                                                 |                                                                                                                                 | 2472 849   | 53.3        | 2279         |           |                      |                     |                    |         |
| KL0483                                        |                                                                  |                                                                                 |                                                                                                                                 | 2577 295   | 53.4        | 2395         |           |                      |                     |                    |         |
| KL0497                                        |                                                                  |                                                                                 |                                                                                                                                 | 2477 500   | 53.3        | 2261         |           |                      |                     |                    |         |
| KL0501                                        |                                                                  |                                                                                 |                                                                                                                                 | 2446 525   | 53.3        | 2221         |           |                      |                     |                    |         |
| KL0515                                        |                                                                  |                                                                                 |                                                                                                                                 | 2449 403   | 53.3        | 2212         |           |                      |                     |                    |         |
| KL0540                                        |                                                                  |                                                                                 |                                                                                                                                 | 2474 507   | 53.4        | 2254         |           |                      |                     |                    |         |
| KL0541                                        |                                                                  |                                                                                 |                                                                                                                                 | 2640 162   | 53.4        | 2485         |           |                      |                     |                    |         |
| KL0547                                        |                                                                  |                                                                                 |                                                                                                                                 | 2549 371   | 53.3        | 2364         |           |                      |                     |                    |         |
| KL0556                                        |                                                                  |                                                                                 |                                                                                                                                 | 2421 288   | 53.3        | 2169         |           |                      |                     |                    |         |
| KL0785                                        |                                                                  |                                                                                 |                                                                                                                                 | 2470 695   | 53.4        | 2237         |           |                      |                     |                    |         |



| Strain | Authority | Other deposits | Synonyms | Base pairs  | Percent G+C | No. proteins | Goldstamp | Bioproject accession | Biosample accession | Assembly accession | IMG OID |
|--------|-----------|----------------|----------|-------------|-------------|--------------|-----------|----------------------|---------------------|--------------------|---------|
| KL0796 |           |                |          | 2603<br>053 | 53.4        | 2435         |           |                      |                     |                    |         |
| KL0818 |           |                |          | 2474<br>549 | 53.4        | 2245         |           |                      |                     |                    |         |
| KL0825 |           |                |          | 2499<br>718 | 53.3        | 2289         |           |                      |                     |                    |         |
| KL0832 |           |                |          | 2452<br>482 | 53.3        | 2217         |           |                      |                     |                    |         |
| KL0840 |           |                |          | 2449<br>355 | 53.3        | 2212         |           |                      |                     |                    |         |
| KL0846 |           |                |          | 2443<br>613 | 53.3        | 2205         |           |                      |                     |                    |         |
| KL0853 |           |                |          | 2557<br>514 | 53.4        | 2343         |           |                      |                     |                    |         |
| KL0867 |           |                |          | 2514<br>118 | 53.3        | 2319         |           |                      |                     |                    |         |
| KL0870 |           |                |          | 2575<br>028 | 53.4        | 2385         |           |                      |                     |                    |         |
| KL0876 |           |                |          | 2469<br>953 | 53.3        | 2231         |           |                      |                     |                    |         |

## Methods, Results and References

The genome sequence data were uploaded to the Type (Strain) Genome Server (TYGS), a free bioinformatics platform available under <https://tygs.dsmz.de>, for a whole genome-based taxonomic analysis [1]. The results were provided by the TYGS on 2020-06-11. In brief, the TYGS analysis was subdivided into the following steps:

### Determination of closely related type strains

Determination of closest type strain genomes was done in two complementary ways: First, all user genomes were compared against all type strain genomes available in the TYGS database via the MASH algorithm, a fast approximation of intergenomic relatedness [2], and, the ten type strains with the smallest MASH distances chosen per user genome. Second, an additional set of ten closely related type strains was determined via the 16S rDNA gene sequences. These were extracted from the user genomes using RNAmmer [3] and each sequence was subsequently BLASTed [4] against the 16S rDNA gene sequence of each of the currently 11820 type strains available in the TYGS database. This was used as a proxy to find the best 50 matching type strains (according to the bitscore) for each user genome and to subsequently calculate precise distances using the Genome BLAST Distance Phylogeny approach (GBDP) under the algorithm 'coverage' and distance formula  $d_5$  [5]. These distances were finally used to determine the 10 closest type strain genomes for each of the user genomes.

### Pairwise comparison of genome sequences

All pairwise comparisons among the set of genomes were conducted using GBDP and accurate intergenomic distances inferred under the algorithm 'trimming' and distance formula  $d_5$  [5]. 100 distance replicates were calculated each. Digital DDH values and confidence intervals were calculated using the recommended settings of the GGDC 2.1 [5].

### Phylogenetic inference

The resulting intergenomic distances were used to infer a balanced minimum evolution tree with branch support via FASTME 2.1.4 including SPR postprocessing [6]. Branch support was inferred from 100 pseudo-bootstrap replicates each. The trees were rooted at the midpoint [7] and visualized with PhyD3 [8].

### Type-based species and subspecies clustering

The type-based species clustering using a 70% dDDH radius around each of the 14 type strains was done as previously described [1]. The resulting groups are shown in Table 1 and 4. Subspecies clustering was done using a 79% dDDH threshold as previously introduced [9].

## Results

### Type-based species and subspecies clustering

The resulting species and subspecies clusters are listed in Table 4, whereas the taxonomic identification of the query strains is found in Table 1. Briefly, the clustering yielded 12 species clusters and the provided query strains were assigned to 1 of these. Moreover, user strains were located in 1 of 12 subspecies clusters.

### Figure caption genome tree

**Figure 1.** Tree inferred with FastME 2.1.6.1 [6] from GBDP distances calculated from genome sequences. The branch lengths are scaled in terms of GBDP distance formula  $d_5$ . The numbers above branches are GBDP pseudo-bootstrap support values > 60 % from 100 replications, with an average branch support of 26.8 %. The tree was rooted at the midpoint [7].

### Figure caption SSU tree

**Figure 2.** Tree inferred with FastME 2.1.6.1 [6] from GBDP distances calculated from 16S rDNA gene sequences. The branch lengths are scaled in terms of GBDP distance formula  $d_5$ . The numbers above branches are GBDP pseudo-bootstrap support values > 60 % from 100 replications, with an average branch support of 43.4 %. The tree was rooted at the midpoint [7].

## References

- [1] Meier-Kolthoff JP, Göker M. TYGS is an automated high-throughput platform for state-of-the-art genome-based taxonomy. *Nat. Commun.* 2019;10: 2182. DOI: 10.1038/s41467-019-10210-3
- [2] Ondov BD, Treangen TJ, Melsted P, et al. Mash: Fast genome and metagenome distance estimation using MinHash. *Genome Biol* 2016;17: 1–14. DOI: 10.1186/s13059-016-0997-x
- [3] Lagesen K, Hallin P. RNAmmer: consistent and rapid annotation of ribosomal RNA genes. *Nucleic Acids Res. Oxford Univ Press*; 2007;35: 3100–3108. DOI: 10.1093/nar/gkm160
- [4] Camacho C, Coulouris G, Avagyan V, Ma N, Papadopoulos J, Bealer K, et al. BLAST+: architecture and applications. *BMC Bioinformatics.* 2009;10: 421. DOI: 10.1186/1471-2105-10-421
- [5] Meier-Kolthoff JP, Auch AF, Klenk H-P, Göker M. Genome sequence-based species delimitation with confidence intervals and improved distance functions. *BMC Bioinformatics.* 2013;14: 60. DOI: 10.1186/1471-2105-14-60
- [6] Lefort V, Desper R, Gascuel O. FastME 2.0: A comprehensive, accurate, and fast distance-based phylogeny inference program. *Mol Biol Evol.* 2015;32: 2798–2800. DOI: 10.1093/molbev/msv150
- [7] Farris JS. Estimating phylogenetic trees from distance matrices. *Am Nat.* 1972;106: 645–667.
- [8] Kreft L, Botzki A, Coppens F, Vandepoele K, Van Bel M. PhyD3: A phylogenetic tree viewer with extended phyloXML support for functional genomics data visualization. *Bioinformatics.* 2017;33: 2946–2947. DOI: 10.1093/bioinformatics/btx324
- [9] Meier-Kolthoff JP, Hahnke RL, Petersen J, Scheuner C, Michael V, Fiebig A, et al. Complete genome sequence of DSM 30083<sup>T</sup>, the type strain (U5/41<sup>T</sup>) of *Escherichia coli*, and a proposal for delineating subspecies in microbial taxonomy. *Stand Genomic Sci.* 2014;9: 2. DOI: 10.1186/1944-3277-9-2
